# Supplementary material
Source: MDPI journal article supplement (https://www.mdpi.com/2079-9276/12/6/65)

Figure S1: The lithostratigraphic map legend adopted and translated to English from Geological Map of mainland Portugal at 1:1 000 000 scale produced by the National Laboratory of Energy and Geology [58, 59, 62]. The original can be found in [https://geoportal.lneg.pt/media/p4wft3w5/cgp1m\\_2010.pdf](https://geoportal.lneg.pt/media/p4wft3w5/cgp1m_2010.pdf).(accessed on 22 of May of 2023).

|          |            |             | Meso-Cenozoic Basins                                    |                                                                                                                                                                                                              |
|----------|------------|-------------|---------------------------------------------------------|--------------------------------------------------------------------------------------------------------------------------------------------------------------------------------------------------------------|
| Cenozoic | Quaternary | Holocene    | Q <sup>2</sup>                                          | Q <sup>2</sup> : Sands, gravel, silts and clays                                                                                                                                                              |
|          |            | Pleistocene | Q <sup>1</sup>                                          | Q <sup>1</sup> : Conglomerates, sandstones, siltites, and argillites                                                                                                                                         |
|          | Neogene    | Pliocene    | N <sup>2</sup>                                          | N <sup>2</sup> : Sandstones, conglomerates, and siltites                                                                                                                                                     |
|          |            | Miocene     | N <sup>1</sup> <sub>c</sub> N <sup>1</sup> <sub>m</sub> | N <sup>1</sup> <sub>c</sub> : Sandstones, argillites, conglomerates, and limestones (continental deposits); N <sup>1</sup> <sub>m</sub> : Conglomerates, sandstones, biocalarenites, siltites and argillites |
| Mesozoic | Paleogene  |             | E                                                       | E: Sandstones, arkoses, conglomerates, argillites and siltites                                                                                                                                               |
|          |            |             |                                                         |                                                                                                                                                                                                              |
|          | Cretaceous | Upper       | CVL <sup>1</sup> K <sup>2</sup>                         | CVL: Basalts, pyroclastics, microgabbros, rare gabbros and sedimentary intercalations (Lisbon Volcanic Complex: 75-72 Ma); K <sup>2</sup> : Sandstones and argillites                                        |
|          |            |             | K <sup>2-2</sup>                                        | K <sup>2-2</sup> : Limestones (with rudists at the top, south of Leiria), sandstones, marls, and dolomites; basic magmatism: 94-88 Ma                                                                        |
|          | Lower      |             | K <sup>1</sup>                                          | K <sup>1</sup> : Sandstones, limestones, marls, and dolomites; basic magmatism: 135-130 Ma                                                                                                                   |
|          |            |             |                                                         |                                                                                                                                                                                                              |
|          | Upper      |             | J <sup>3</sup>                                          | J <sup>3</sup> : Limestones, marls, and sandstones                                                                                                                                                           |
|          |            |             |                                                         |                                                                                                                                                                                                              |
| Jurassic | Middle     |             | J <sup>2</sup>                                          | J <sup>2</sup> : Limestones, marls, and dolomites                                                                                                                                                            |
|          |            |             |                                                         |                                                                                                                                                                                                              |
|          | Lower      |             | J <sup>1</sup>                                          | J <sup>1</sup> : Limestones, marls, and dolomites;                                                                                                                                                           |
|          |            |             |                                                         | Basic magmatism: volcanics and dykes (200-180 Ma)                                                                                                                                                            |
| Triassic | Upper      |             | TJ <sup>1</sup>                                         | TJ <sup>1</sup> : Sandstones, argillites, and evaporites with carbonate intercalations;                                                                                                                      |
|          |            |             |                                                         |                                                                                                                                                                                                              |

|                |               |          | Autochthonous, sub- autochthonous and allochthonous terrains (with allochthony <50km) |                                                                                                |
|----------------|---------------|----------|---------------------------------------------------------------------------------------|------------------------------------------------------------------------------------------------|
| Paleozoic      | Carboniferous | Upper    | <b>Central-Iberian Zone</b>                                                           |                                                                                                |
|                |               |          | C <sup>2</sup>                                                                        | C <sup>2</sup> : Conglomerates, sandstones, argillites and coal                                |
|                |               |          |                                                                                       |                                                                                                |
|                |               | Lower    | C <sup>1</sup> <sub>b</sub>                                                           | C <sup>1</sup> <sub>b</sub> : Phyllites and metacalcareous rocks                               |
|                |               |          |                                                                                       |                                                                                                |
|                |               |          |                                                                                       |                                                                                                |
|                | Devonian      | Upper    |                                                                                       |                                                                                                |
|                |               | Middle   |                                                                                       |                                                                                                |
|                |               | Lower    |                                                                                       |                                                                                                |
|                |               | Silurian |                                                                                       |                                                                                                |
| Ordovician     |               |          |                                                                                       |                                                                                                |
|                |               |          |                                                                                       |                                                                                                |
| Cambrian       |               |          |                                                                                       |                                                                                                |
|                |               |          |                                                                                       |                                                                                                |
| Neoproterozoic |               |          |                                                                                       |                                                                                                |
|                |               |          |                                                                                       |                                                                                                |
|                | Carboniferous | Upper    | <b>Ossa-Morena Zone</b>                                                               |                                                                                                |
|                |               |          | C <sup>2</sup>                                                                        | C <sup>2</sup> : Conglomerates, sandstones, argillites and coal                                |
|                |               |          |                                                                                       |                                                                                                |
|                |               | Lower    | D <sup>2-3</sup> <sub>a</sub>                                                         | D <sup>2-3</sup> <sub>a</sub> : Acid and basic metavolcanics, metargillites and metacalcareous |
|                |               |          |                                                                                       |                                                                                                |
|                |               |          |                                                                                       |                                                                                                |
|                | Devonian      | Upper    |                                                                                       |                                                                                                |
|                |               | Middle   |                                                                                       |                                                                                                |
|                |               | Lower    |                                                                                       |                                                                                                |
|                |               | Silurian |                                                                                       |                                                                                                |
| Ordovician     |               |          |                                                                                       |                                                                                                |
|                |               |          |                                                                                       |                                                                                                |
| Cambrian       |               |          |                                                                                       |                                                                                                |
|                |               |          |                                                                                       |                                                                                                |
| Neoproterozoic |               |          |                                                                                       |                                                                                                |
|                |               |          |                                                                                       |                                                                                                |
|                | Carboniferous | Upper    | <b>South-Portuguese Zone</b>                                                          |                                                                                                |
|                |               |          | C <sup>1-2</sup>                                                                      | C <sup>1-2</sup> : Phyllites, metagraywackes and metaconglomerates (flysch)                    |
|                |               |          | C <sup>1</sup> <sub>b</sub>                                                           | C <sup>1</sup> <sub>b</sub> : Phyllites, metasilstones and metacalcareous                      |
|                |               |          |                                                                                       |                                                                                                |
|                |               | Lower    | D <sup>2-3</sup>                                                                      | D <sup>2-3</sup> : Acid and basic metavolcanics and phyllites (Iberian Pyrite Belt)            |
|                |               |          |                                                                                       |                                                                                                |
|                | Devonian      | Upper    |                                                                                       |                                                                                                |
|                |               | Middle   |                                                                                       |                                                                                                |
|                |               | Lower    |                                                                                       |                                                                                                |
|                |               | Silurian |                                                                                       |                                                                                                |
| Ordovician     |               |          |                                                                                       |                                                                                                |
|                |               |          |                                                                                       |                                                                                                |
| Cambrian       |               |          |                                                                                       |                                                                                                |
|                |               |          |                                                                                       |                                                                                                |
| Neoproterozoic |               |          |                                                                                       |                                                                                                |
|                |               |          |                                                                                       |                                                                                                |

*Table S1: Summary of number of features representing lithology (Singlefeature and Multifeature) per Age and per Geotectonic Zone and correspondent Area, used to assess the lithological diversity of mainland Portugal. Source: Geological Map of Portugal at 1:1 000 000 scale [59].*

| Geotectonic Zone                          | Age                                | Multifeature (n°) | Singlefeature (n°) | Area (Km <sup>2</sup> ) |
|-------------------------------------------|------------------------------------|-------------------|--------------------|-------------------------|
| Meso-Cenozoic Basins                      | Holocene                           | 1                 | 115                | 3986.9                  |
|                                           | Pleistocene                        | 1                 | 188                | 2191.8                  |
|                                           | Pliocene                           | 1                 | 173                | 6628.1                  |
|                                           | Miocene                            | 2                 | 151                | 4463.9                  |
|                                           | Paleogene                          | 1                 | 115                | 2903.5                  |
|                                           | Upper Cretaceous                   | 1                 | 25                 | 165.0                   |
|                                           | Upper Cretaceous                   | 1                 | 26                 | 436.9                   |
|                                           | Lower Cretaceous                   | 1                 | 38                 | 466.7                   |
|                                           | Cretaceous                         | 1                 | 59                 | 1199.8                  |
|                                           | Upper Jurassic                     | 1                 | 43                 | 2690.2                  |
|                                           | Middle Jurassic                    | 1                 | 40                 | 1000.9                  |
|                                           | Lower Jurassic                     | 1                 | 45                 | 669.4                   |
|                                           | Upper Triassic to Lower Jurassic   | 1                 | 46                 | 544.5                   |
|                                           | 100-72 Ma                          | 2                 | 8                  | 38.5                    |
| Total                                     | 13                                 | 16                | 1072               | 23399.2 (28%)           |
| Central-Iberian Zone                      | Lower Carboniferous                | 1                 | 1                  | 17.1                    |
|                                           | Lower Devonian                     | 2                 | 16                 | 379.5                   |
|                                           | Silurian                           | 1                 | 42                 | 401.3                   |
|                                           | Ordovician                         | 1                 | 93                 | 1761.9                  |
|                                           | Ediacarian to Cambrian             | 1                 | 96                 | 10782.8                 |
|                                           | 320-310 Ma                         | 2                 | 119                | 6284.9                  |
| Total                                     | 6                                  | 8                 | 367                | 19627.5 (23%)           |
| Central-Iberian Zone and Ossa-Morena Zone | Upper Carboniferous                | 1                 | 12                 | 68.0                    |
|                                           | 490-470 Ma                         | 4                 | 68                 | 1190.3                  |
|                                           | 310-290 Ma                         | 6                 | 153                | 12507.8                 |
|                                           | 360-310 Ma                         | 1                 | 23                 | 1151.5                  |
| Total                                     | 4                                  | 12                | 256                | 14917.6 (18%)           |
| Galicia-Trás-os-Montes Zone               | Silurian-Devonian                  | 2                 | 11                 | 343.0                   |
|                                           | Ordovician to Devonian             | 6                 | 68                 | 5076.0                  |
|                                           | Proterozoic-Cambrian               | 4                 | 18                 | 387.1                   |
| Total                                     | 3                                  | 12                | 97                 | 5806.1 (7%)             |
| Ossa-Morena Zone                          | Middle Devonian to Lower Carbonic  | 2                 | 7                  | 196.5                   |
|                                           | Lower to Middle Devonian           | 1                 | 3                  | 319.3                   |
|                                           | Lower Devonian                     | 1                 | 9                  | 36.9                    |
|                                           | Ordovician to Lower Devonian       | 1                 | 14                 | 425.9                   |
|                                           | Upper Ordovician to Lower Devonian | 1                 | 43                 | 1945.1                  |
|                                           | Ordovician                         | 2                 | 30                 | 728.7                   |

|                                         |                                       |    |      |               |
|-----------------------------------------|---------------------------------------|----|------|---------------|
|                                         | Upper Cambrian                        | 1  | 21   | 1279.2        |
|                                         | Lower Cambrian                        | 2  | 31   | 692.1         |
|                                         | Neoproterozoic                        | 2  | 64   | 1967.5        |
|                                         | 360-310 Ma                            | 2  | 62   | 2175.9        |
|                                         | 310-290 Ma                            | 2  | 10   | 534.0         |
| Total                                   | 11                                    | 17 | 294  | 10301.1 (12%) |
| South-Portuguese Zone                   | Lower Carboniferous                   | 1  | 2    | 44.9          |
|                                         | Carboniferous                         | 1  | 21   | 7064.6        |
|                                         | Upper Devonian to Lower Carboniferous | 1  | 30   | 652.1         |
|                                         | Middle Devonian to Lower Carbonic     | 2  | 35   | 855.1         |
|                                         | Upper Silurian to Lower Devonian      | 2  | 12   | 932.7         |
| Total                                   | 5                                     | 7  | 100  | 9549.3 (11%)  |
| Intrusive and phyllonian magmatic rocks | 100-72 Ma                             | 1  | 3    | 78.3          |
|                                         | 230-72 Ma                             | 1  | 20   | 48.3          |
| Total                                   | 2                                     | 2  | 23   | 126.6 (0%)    |
| Soma(Total)                             | 44                                    | 74 | 2209 |               |

Table S2: Summary of classes and number of features per class within the distinct hierarchical levels of information. Number of classes (NC) and number of features per class (NF), used to assess the geomorphological diversity of mainland Portugal. Total number of features: 686. Source: geomorphological units map of mainland Portugal at 1:500 000 scale (Figure. 2b).

| First Level: 4 classes              |     | Second Level: 12 classes                   |     |     | Third level: 72 classes (686 forth level features) |
|-------------------------------------|-----|--------------------------------------------|-----|-----|----------------------------------------------------|
| classes                             |     | classes                                    | NF  | NC3 |                                                    |
| 1 Hesperian Massif                  | 1.1 | NW Iberian Plateaus and Mountains          | 259 | 24  |                                                    |
|                                     | 1.2 | Central Mountain Range                     | 25  | 3   |                                                    |
|                                     | 1.3 | SW Iberian Plateaus and Hills              | 138 | 15  |                                                    |
| 2 Slightly deformed Mesozoic Basins | 2.1 | Lusitanian Basin                           | 68  | 14  |                                                    |
|                                     | 2.2 | Algarve Basin                              | 7   | 2   |                                                    |
| 3 Cenozoic Basins                   | 3.1 | Lima, Cávado and Douro Rivers Estuaries    | 11  | 1   |                                                    |
|                                     | 3.2 | Mondego River Estuary                      | 1   | 1   |                                                    |
|                                     | 3.3 | Cenozoic Basins of Baixo Tejo and Alvalade | 54  | 5   |                                                    |
|                                     | 3.4 | Cenozoic Douro Basin                       | 1   | 1   |                                                    |
|                                     | 3.5 | Cenozoic Guadiana Basin                    | 1   | 1   |                                                    |
| 4 Coastal Plains                    | 4.1 | Coastal Plains                             | 96  | 3   |                                                    |
|                                     | 4.2 |                                            | 25  | 2   |                                                    |

Table S3: Mode, Multiplicity of mode and correspondent % of Richness, SIDI, SIEI, SHDI, and SHEI, used to assess the lithological diversity of mainland Portugal. Source: Geological Map of Portugal at 1:1 000 000 scale [59].

| Lithology      |             |                      |      |      |                      |      |      |                      |      |      |                      |      |      |                      |      |      |
|----------------|-------------|----------------------|------|------|----------------------|------|------|----------------------|------|------|----------------------|------|------|----------------------|------|------|
| Cell_Km<br>(L) | N<br>filled | Richness             |      |      | SIDI                 |      |      | SIEI                 |      |      | SHDI                 |      |      | SHEI                 |      |      |
|                |             | Multiplicity<br>Mode | %    | Mode |
| 30             | 150         | 23                   | 15.2 | 8    | 3                    | 2.0  | 0    | 3                    | 2.0  | 0    | 3                    | 2.0  | 0    | 3                    | 2.0  | 0    |
| 25             | 212         | 25                   | 11.7 | 6    | 9                    | 4.2  | 0    | 9                    | 4.2  | 0    | 9                    | 4.2  | 0    | 9                    | 4.2  | 0    |
| 20             | 315         | 43                   | 13.7 | 4    | 12                   | 3.8  | 0    | 13                   | 4.1  | 0    | 13                   | 4.1  | 0    | 13                   | 4.1  | 0    |
| 15             | 536         | 86                   | 16.0 | 4    | 37                   | 6.9  | 0    | 37                   | 6.9  | 0    | 37                   | 6.9  | 0    | 37                   | 6.9  | 0    |
| 10             | 1156        | 234                  | 20.3 | 3    | 114                  | 9.9  | 0    | 114                  | 9.9  | 0    | 114                  | 9.9  | 0    | 114                  | 9.9  | 0    |
| 5              | 4366        | 1248                 | 28.6 | 2    | 1002                 | 23.0 | 0    | 1002                 | 23.0 | 0    | 1002                 | 23.0 | 0    | 1002                 | 23.0 | 0    |
| 2              | 26390       | 12193                | 46.3 | 1    | 12193                | 46.3 | 0    | 12193                | 46.3 | 0    | 12193                | 46.3 | 0    | 12193                | 46.3 | 0    |
| 1              | 104222      | 67147                | 64.6 | 1    | 67147                | 64.6 | 0    | 67148                | 64.6 | 0    | 67147                | 64.6 | 0    | 67148                | 64.6 | 0    |

Table S4: Histograms and boxplots of Richness, SIDI, SIEI, SHDI, and SHEI used to assess the lithological diversity of mainland Portugal. Outliers were identified by  $\text{Median} \pm 1.25 \times \text{IQR}$ . Data were processed in Andad 7.12 (CVRM/IST, 2000). Source: Geological Map of Portugal at 1:1 000 000 scale [59].

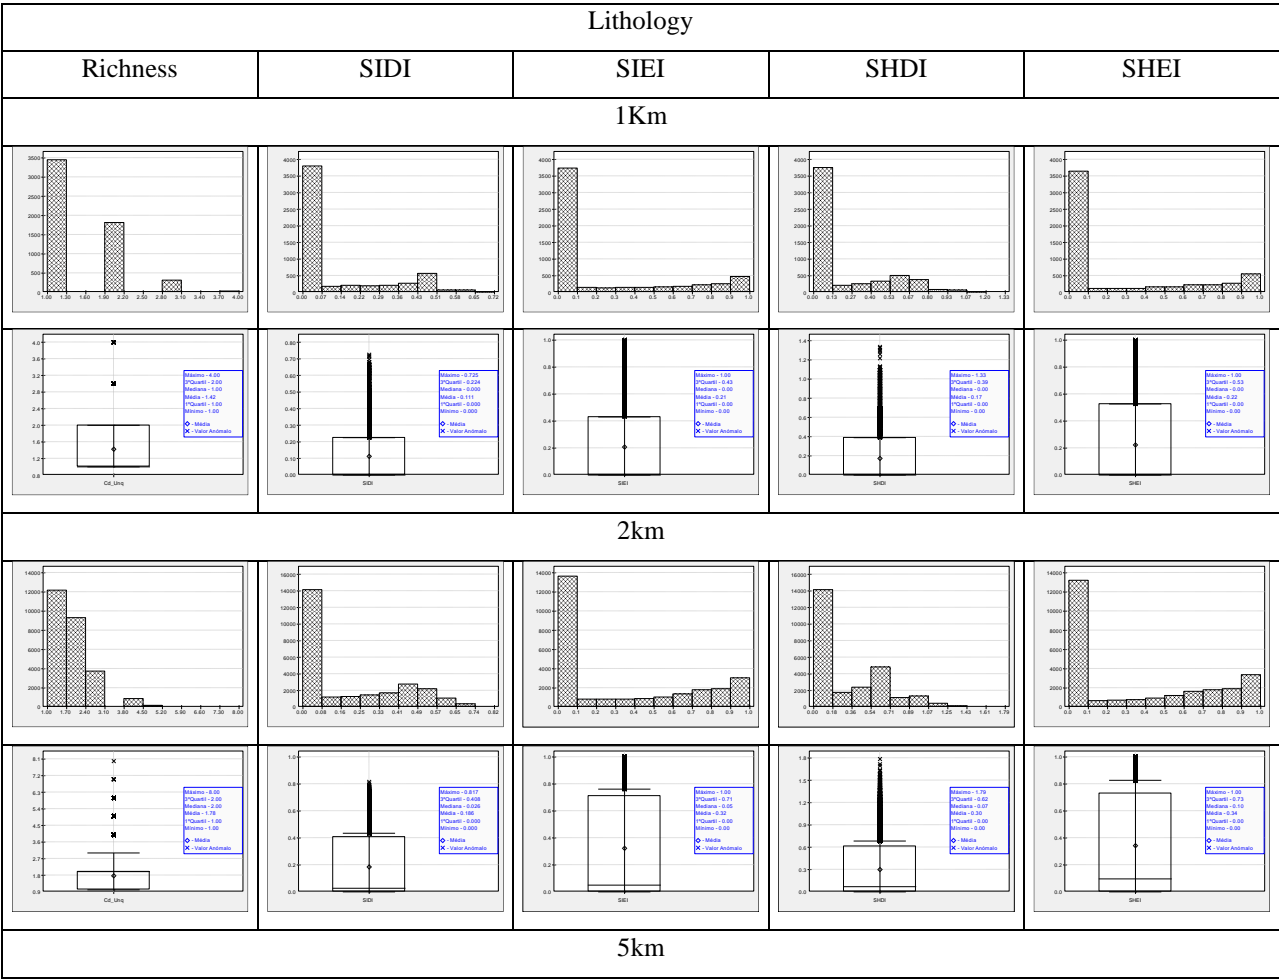

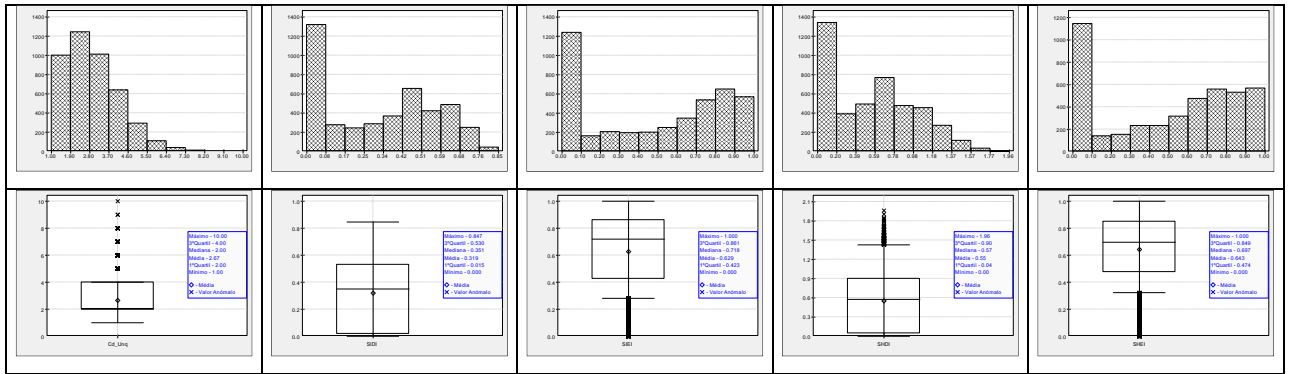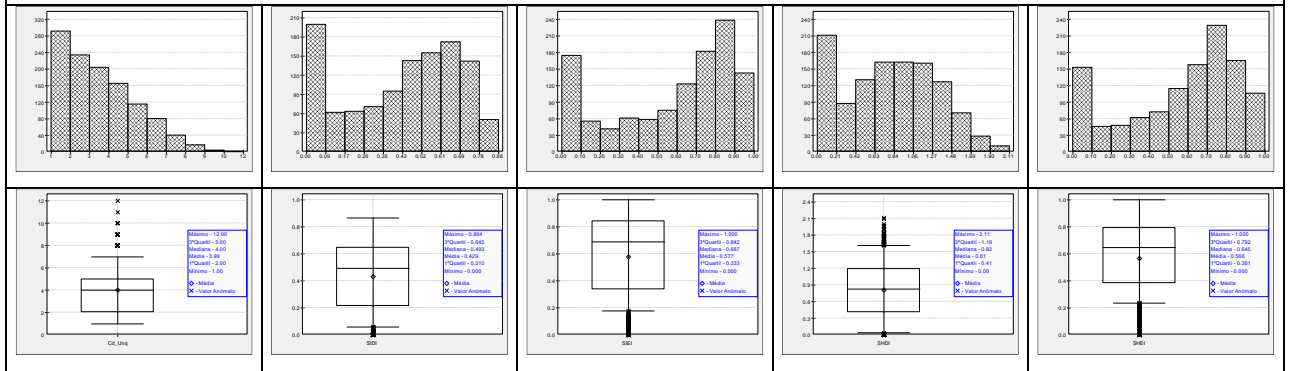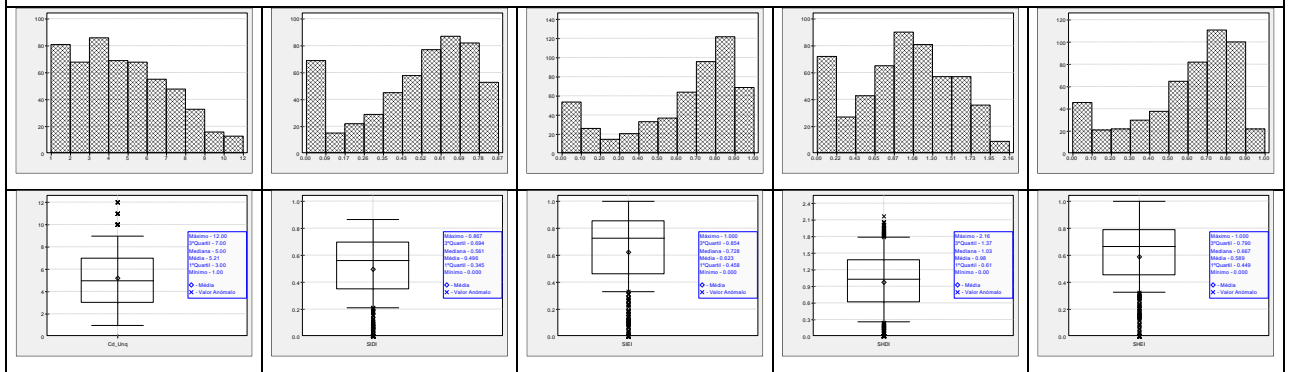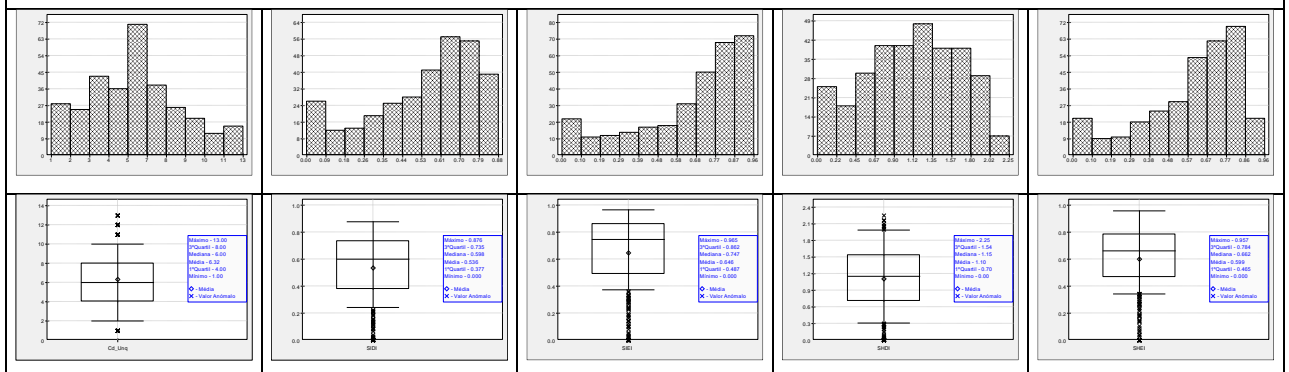

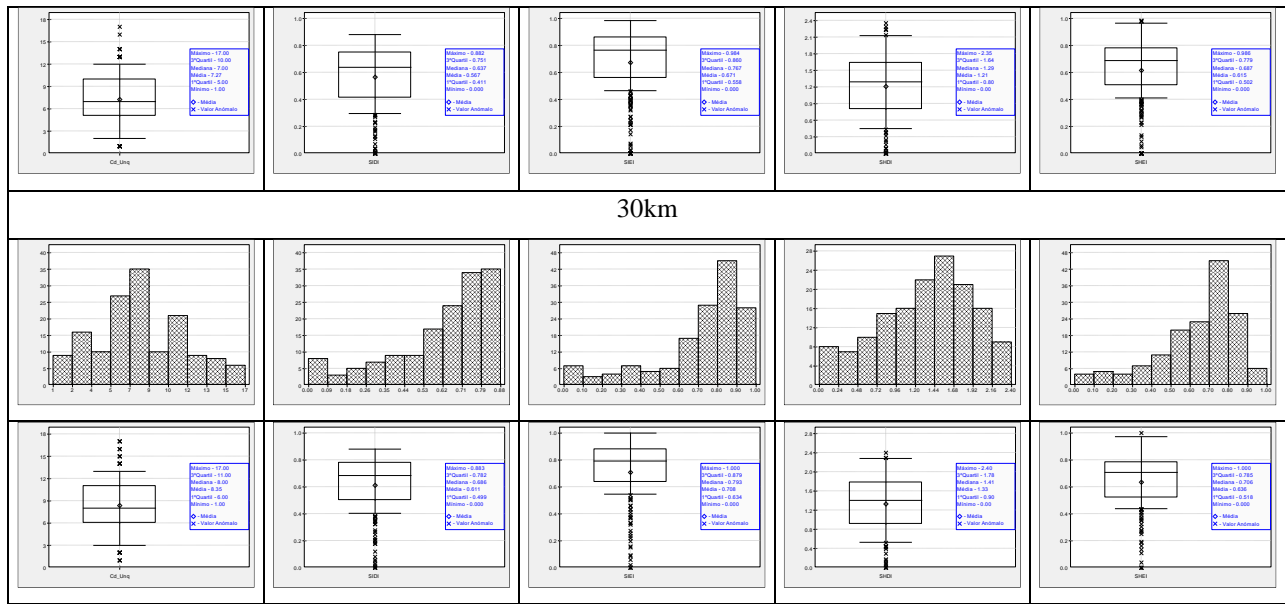

Table S5: Mode, Multiplicity of mode and correspondent % of Richness, SIDI, SIEI, SHDI, and SHEI used to assess the geomorphological diversity of mainland Portugal. Source: geomorphological units map of mainland Portugal at 1:500 000 scale (Figure 2b).

| Geomorphology  |             |                      |      |      |                      |      |      |                      |      |      |                      |      |      |                      |      |      |
|----------------|-------------|----------------------|------|------|----------------------|------|------|----------------------|------|------|----------------------|------|------|----------------------|------|------|
| Cell_Km<br>(L) | N<br>filled | Richness             |      |      | SIDI                 |      |      | SIEI                 |      |      | SHDI                 |      |      | SHEI                 |      |      |
|                |             | Multiplicity<br>Mode | %    | Mode |
| 30             | 150         | 16                   | 10.7 | 6    | 6                    | 4.0  | 0    | 6                    | 4.0  | 0    | 6                    | 4.0  | 0    | 6                    | 4.0  | 0    |
| 25             | 212         | 22                   | 10.4 | 8    | 12                   | 5.7  | 0    | 12                   | 5.7  | 0    | 12                   | 5.7  | 0    | 12                   | 5.7  | 0    |
| 20             | 315         | 39                   | 12.4 | 4    | 15                   | 4.8  | 0    | 15                   | 4.8  | 0    | 15                   | 4.8  | 0    | 15                   | 4.8  | 0    |
| 15             | 536         | 90                   | 16.8 | 3    | 38                   | 7.1  | 0    | 38                   | 7.1  | 0    | 38                   | 7.1  | 0    | 38                   | 7.1  | 0    |
| 10             | 1156        | 249                  | 21.5 | 2    | 151                  | 13.1 | 0    | 151                  | 13.1 | 0    | 151                  | 13.1 | 0    | 151                  | 13.1 | 0    |
| 5              | 4366        | 1627                 | 37.3 | 2    | 1353                 | 31.0 | 0    | 1353                 | 31.0 | 0    | 1353                 | 31.0 | 0    | 1353                 | 31.0 | 0    |
| 2              | 26390       | 16309                | 61.8 | 1    | 16309                | 61.8 | 0    | 16309                | 61.8 | 0    | 16309                | 61.8 | 0    | 16309                | 61.8 | 0    |
| 1              | 104222      | 82317                | 79.0 | 1    | 82317                | 79.0 | 0    | 82317                | 79.0 | 0    | 82317                | 79.0 | 0    | 82317                | 79.0 | 0    |

Table S6: Histograms and boxplots of Richness, SIDI, SIEI, SHDI, and SHEI used to assess the geomorphological diversity of mainland Portugal. Outliers were identified by  $Median \pm 1.25 \times IQR$ . Data were processed in Andad 7.12 (CVRM/IST, 2000). Source: geomorphological units map of mainland Portugal at 1:500 000 scale (Figure.2b).

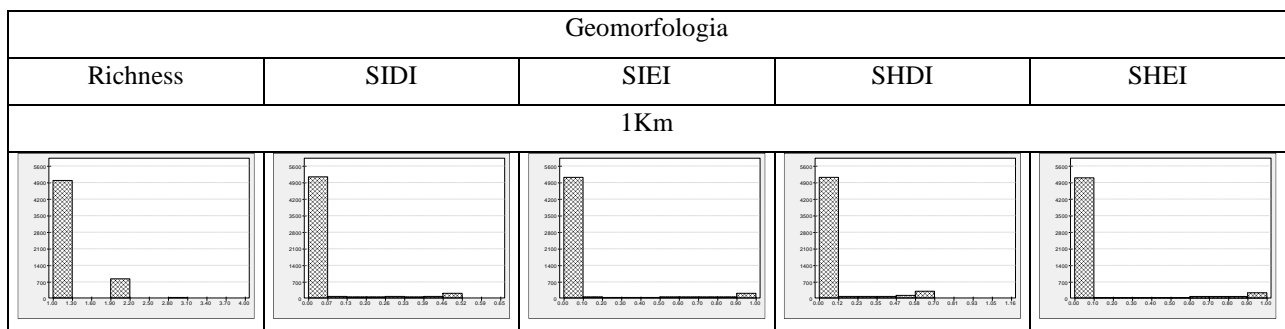

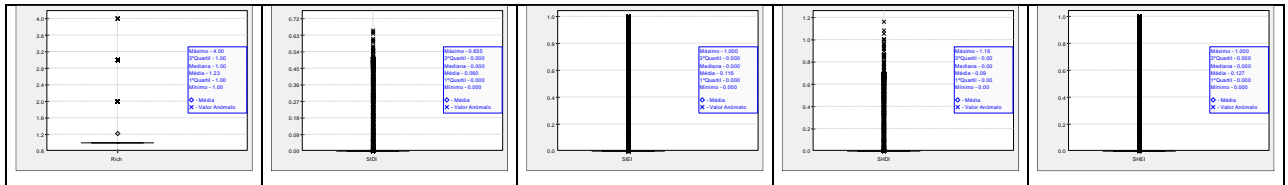

2km

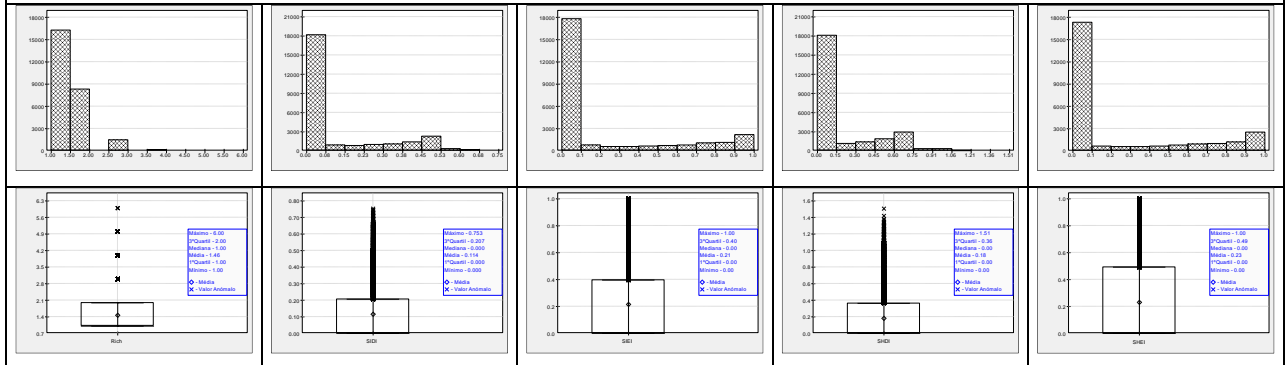

5km

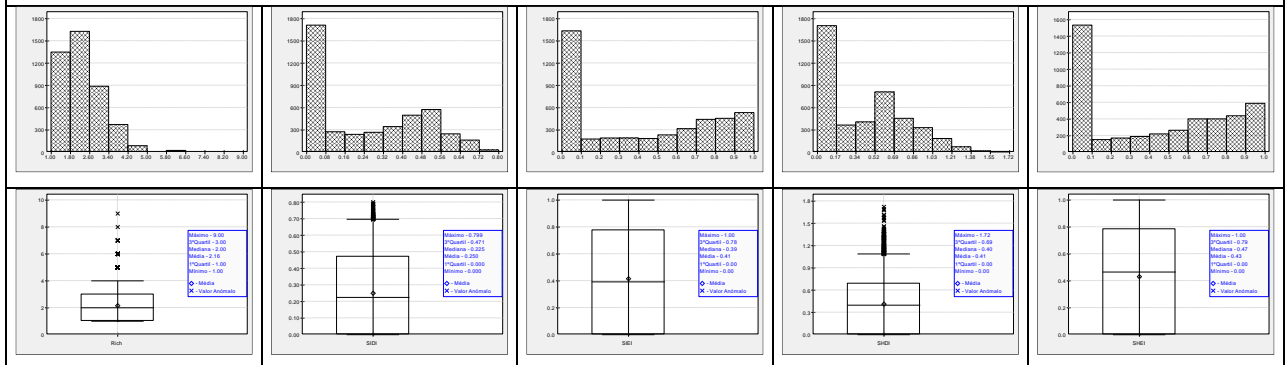

10km

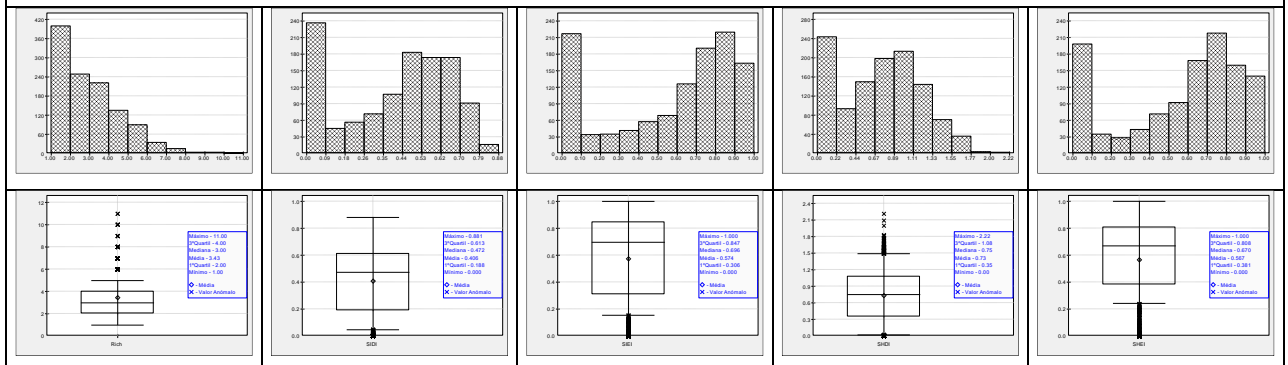

15km

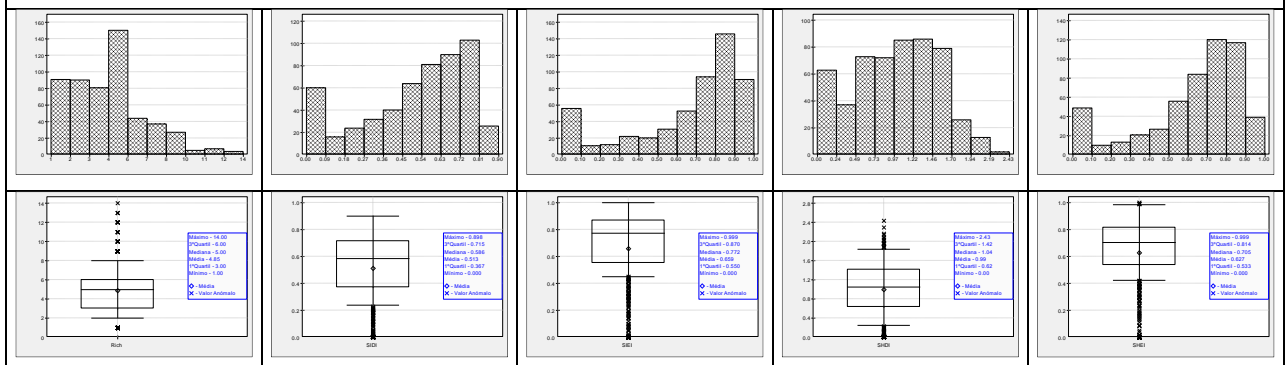

## 20km

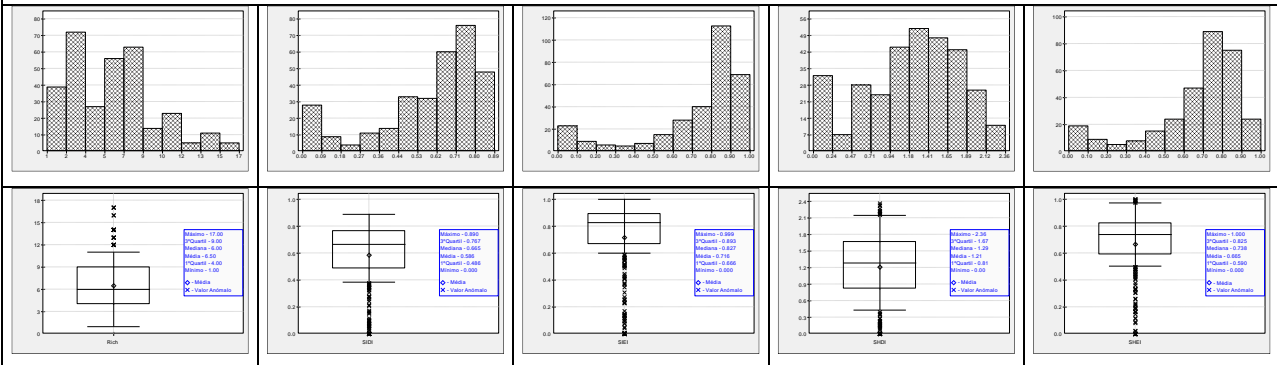

## 25km

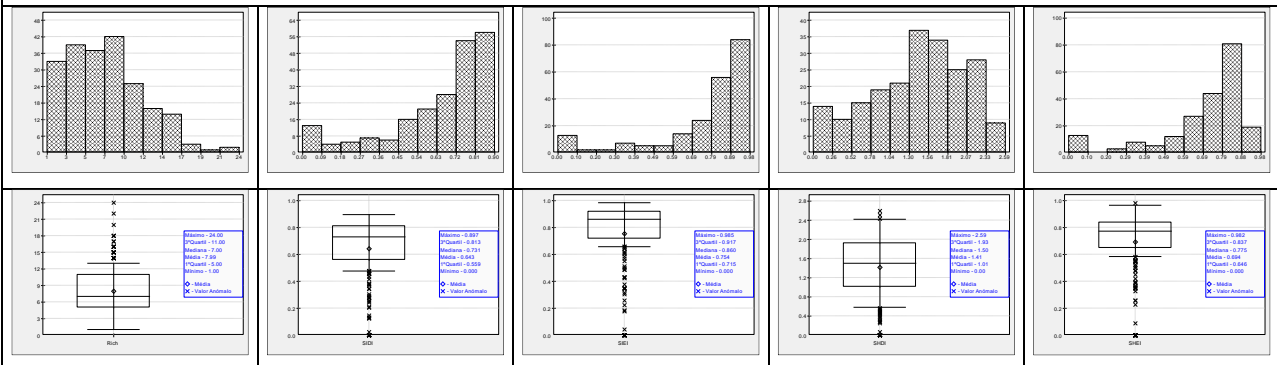

## 30km

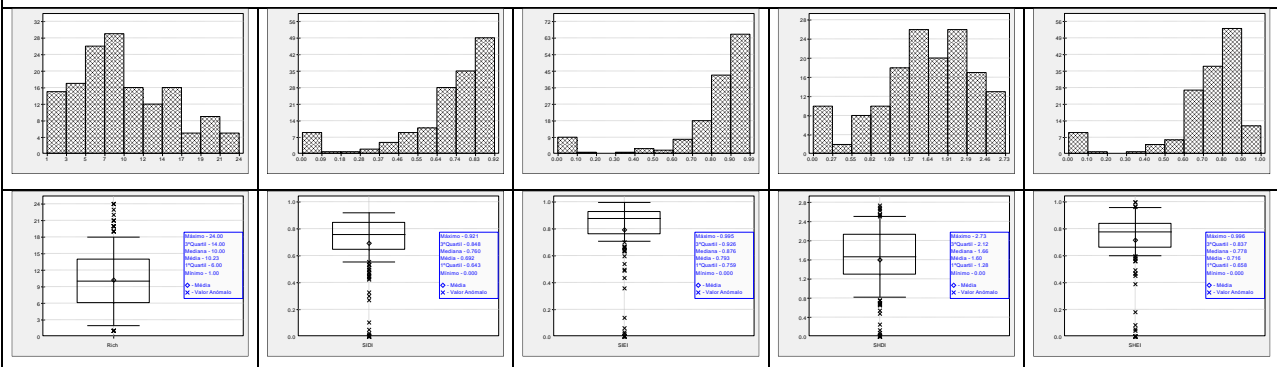



**Figure S2:** Bivariate analysis with Pearson and Spearman correlation coefficients between Richness, SIDI, SIEI, SHDI, and SHEI, along eight distinct cell sizes, regarding geology and geomorphology datasets used to assess the lithological and geomorphological diversity of mainland Portugal.

|           | Geology   |          |           |          | Geomorphology |          |           |          |
|-----------|-----------|----------|-----------|----------|---------------|----------|-----------|----------|
| Grid size | Rich SIDI |          | Rich SIEI |          | Rich SIDI     |          | Rich SIEI |          |
|           | Pearson   | Spearman | Pearson   | Spearman | Pearson       | Spearman | Pearson   | Spearman |
| 1         | 0.824394  |          | 0.77162   |          | 0.819814      |          | 0.794794  |          |
| 2         | 0.81293   | 0.926524 | 0.714791  | 0.870561 | 0.796133      | 0.963367 | 0.741049  | 0.950468 |
| 5         | 0.791511  | 0.851006 | 0.632267  | 0.662659 | 0.76693       | 0.85291  | 0.62557   | 0.724578 |
| 10        | 0.766553  | 0.799447 | 0.592692  | 0.55243  | 0.764156      | 0.810793 | 0.575326  | 0.528057 |
| 15        | 0.745437  | 0.764636 | 0.583943  | 0.530307 | 0.774543      | 0.844843 | 0.602292  | 0.596859 |
| 20        | 0.717223  | 0.738608 | 0.576988  | 0.546155 | 0.732449      | 0.830201 | 0.526431  | 0.485601 |
| 25        | 0.739971  | 0.749057 | 0.579883  | 0.550428 | 0.735432      | 0.860638 | 0.585124  | 0.643729 |
| 30        | 0.734176  | 0.778669 | 0.582563  | 0.582683 | 0.717525      | 0.85844  | 0.515493  | 0.545695 |
|           |           |          |           |          |               |          |           |          |
| Grid size | Rich SHDI |          | Rich SHEI |          | Rich SHDI     |          | Rich SHEI |          |
|           | Pearson   | Spearman | Pearson   | Spearman | Pearson       | Spearman | Pearson   | Spearman |
| 1         | 0.867661  |          | 0.785048  |          | 0.859166      |          | 0.820146  |          |
| 2         | 0.866679  | 0.940093 | 0.708616  | 0.854841 | 0.843799      | 0.967069 | 0.756633  | 0.946903 |
| 5         | 0.866379  | 0.891258 | 0.587897  | 0.600718 | 0.836172      | 0.885801 | 0.599391  | 0.684633 |
| 10        | 0.85757   | 0.863251 | 0.519296  | 0.45016  | 0.853228      | 0.874242 | 0.498603  | 0.422473 |
| 15        | 0.839943  | 0.841698 | 0.496735  | 0.409462 | 0.875492      | 0.89658  | 0.508418  | 0.438581 |
| 20        | 0.828329  | 0.824687 | 0.499033  | 0.415851 | 0.857743      | 0.895421 | 0.403611  | 0.283459 |
| 25        | 0.851707  | 0.838025 | 0.484197  | 0.396418 | 0.872621      | 0.919941 | 0.489823  | 0.439335 |
| 30        | 0.858205  | 0.856064 | 0.493604  | 0.443142 | 0.881731      | 0.926151 | 0.403872  | 0.311188 |
|           |           |          |           |          |               |          |           |          |
| Grid size | SIDI SIEI |          | SIDI SHDI |          | SIDI SIEI     |          | SIDI SHDI |          |
|           | Pearson   | Spearman | Pearson   | Spearman | Pearson       | Spearman | Pearson   | Spearman |
| 1         | 0.988173  |          | 0.993819  |          | 0.994741      |          | 0.995151  |          |
| 2         | 0.976071  | 0.982318 | 0.99056   | 0.997222 | 0.987829      | 0.996473 | 0.993373  | 0.999297 |
| 5         | 0.958191  | 0.932921 | 0.983442  | 0.992097 | 0.96528       | 0.958671 | 0.9869    | 0.993054 |
| 10        | 0.95653   | 0.914585 | 0.976693  | 0.987024 | 0.950248      | 0.888082 | 0.978301  | 0.984639 |
| 15        | 0.962256  | 0.921604 | 0.973293  | 0.984432 | 0.955819      | 0.908887 | 0.971325  | 0.988668 |
| 20        | 0.973627  | 0.952616 | 0.970885  | 0.983404 | 0.940446      | 0.834313 | 0.962128  | 0.98492  |
| 25        | 0.959778  | 0.935127 | 0.967507  | 0.981249 | 0.965864      | 0.926868 | 0.956602  | 0.98279  |
| 30        | 0.964558  | 0.936068 | 0.961551  | 0.982935 | 0.931337      | 0.833134 | 0.943419  | 0.979884 |
|           |           |          |           |          |               |          |           |          |
| Grid size | SIDI SHEI |          | SIEI SHDI |          | SIDI SHEI     |          | SIEI SHDI |          |
|           | Pearson   | Spearman | Pearson   | Spearman | Pearson       | Spearman | Pearson   | Spearman |
| 1         | 0.978997  |          | 0.971129  |          | 0.988827      |          | 0.9849    |          |
| 2         | 0.959842  | 0.972777 | 0.944386  | 0.972392 | 0.978294      | 0.994487 | 0.969837  | 0.99429  |
| 5         | 0.92571   | 0.894325 | 0.901153  | 0.897691 | 0.939926      | 0.933974 | 0.920136  | 0.93297  |
| 10        | 0.912539  | 0.852569 | 0.886128  | 0.858648 | 0.904532      | 0.815052 | 0.879683  | 0.82194  |
| 15        | 0.916901  | 0.850412 | 0.889839  | 0.861127 | 0.900941      | 0.804118 | 0.876554  | 0.857172 |
| 20        | 0.934093  | 0.877893 | 0.897558  | 0.903739 | 0.871175      | 0.692304 | 0.835799  | 0.765966 |
| 25        | 0.902965  | 0.836859 | 0.880194  | 0.87403  | 0.913822      | 0.791658 | 0.866898  | 0.864472 |
| 30        | 0.910798  | 0.850246 | 0.879099  | 0.881892 | 0.860017      | 0.666926 | 0.79768   | 0.758669 |
|           |           |          |           |          |               |          |           |          |
| Grid size | SIEI SHEI |          | SHDI SHEI |          | SIEI SHEI     |          | SHDI SHEI |          |
|           | Pearson   | Spearman | Pearson   | Spearman | Pearson       | Spearman | Pearson   | Spearman |
| 1         | 0.995645  |          | 0.967037  |          | 0.996065      |          | 0.985364  |          |
| 2         | 0.99434   | 0.998024 | 0.931162  | 0.962108 | 0.995363      | 0.999652 | 0.965856  | 0.992019 |
| 5         | 0.990538  | 0.989561 | 0.867607  | 0.858083 | 0.992112      | 0.994083 | 0.896568  | 0.907385 |
| 10        | 0.986109  | 0.979064 | 0.839702  | 0.796745 | 0.986868      | 0.977305 | 0.830456  | 0.750981 |
| 15        | 0.984225  | 0.973847 | 0.842527  | 0.78737  | 0.981297      | 0.958997 | 0.818364  | 0.75139  |
| 20        | 0.970839  | 0.983937 | 0.819279  | 0.863735 | 0.977581      | 0.946316 | 0.757897  | 0.619212 |
| 25        | 0.979627  | 0.956571 | 0.822214  | 0.7688   | 0.979848      | 0.943281 | 0.809277  | 0.720787 |
| 30        | 0.977738  | 0.960415 | 0.830666  | 0.793578 | 0.978156      | 0.928415 | 0.717883  | 0.584414 |

Figure S3: Maps expressing lithological diversity, richness and evenness of mainland Portugal through five indices (Richness, SIDI, SIEI, SHDI, SHEI) along eight cell sizes (1km, 2km, 5km, 10km, 15km, 20km, 25km, 30km). Each map represents five classes (very low, low, medium, high, very high) based on the Jenks natural breaks classification.

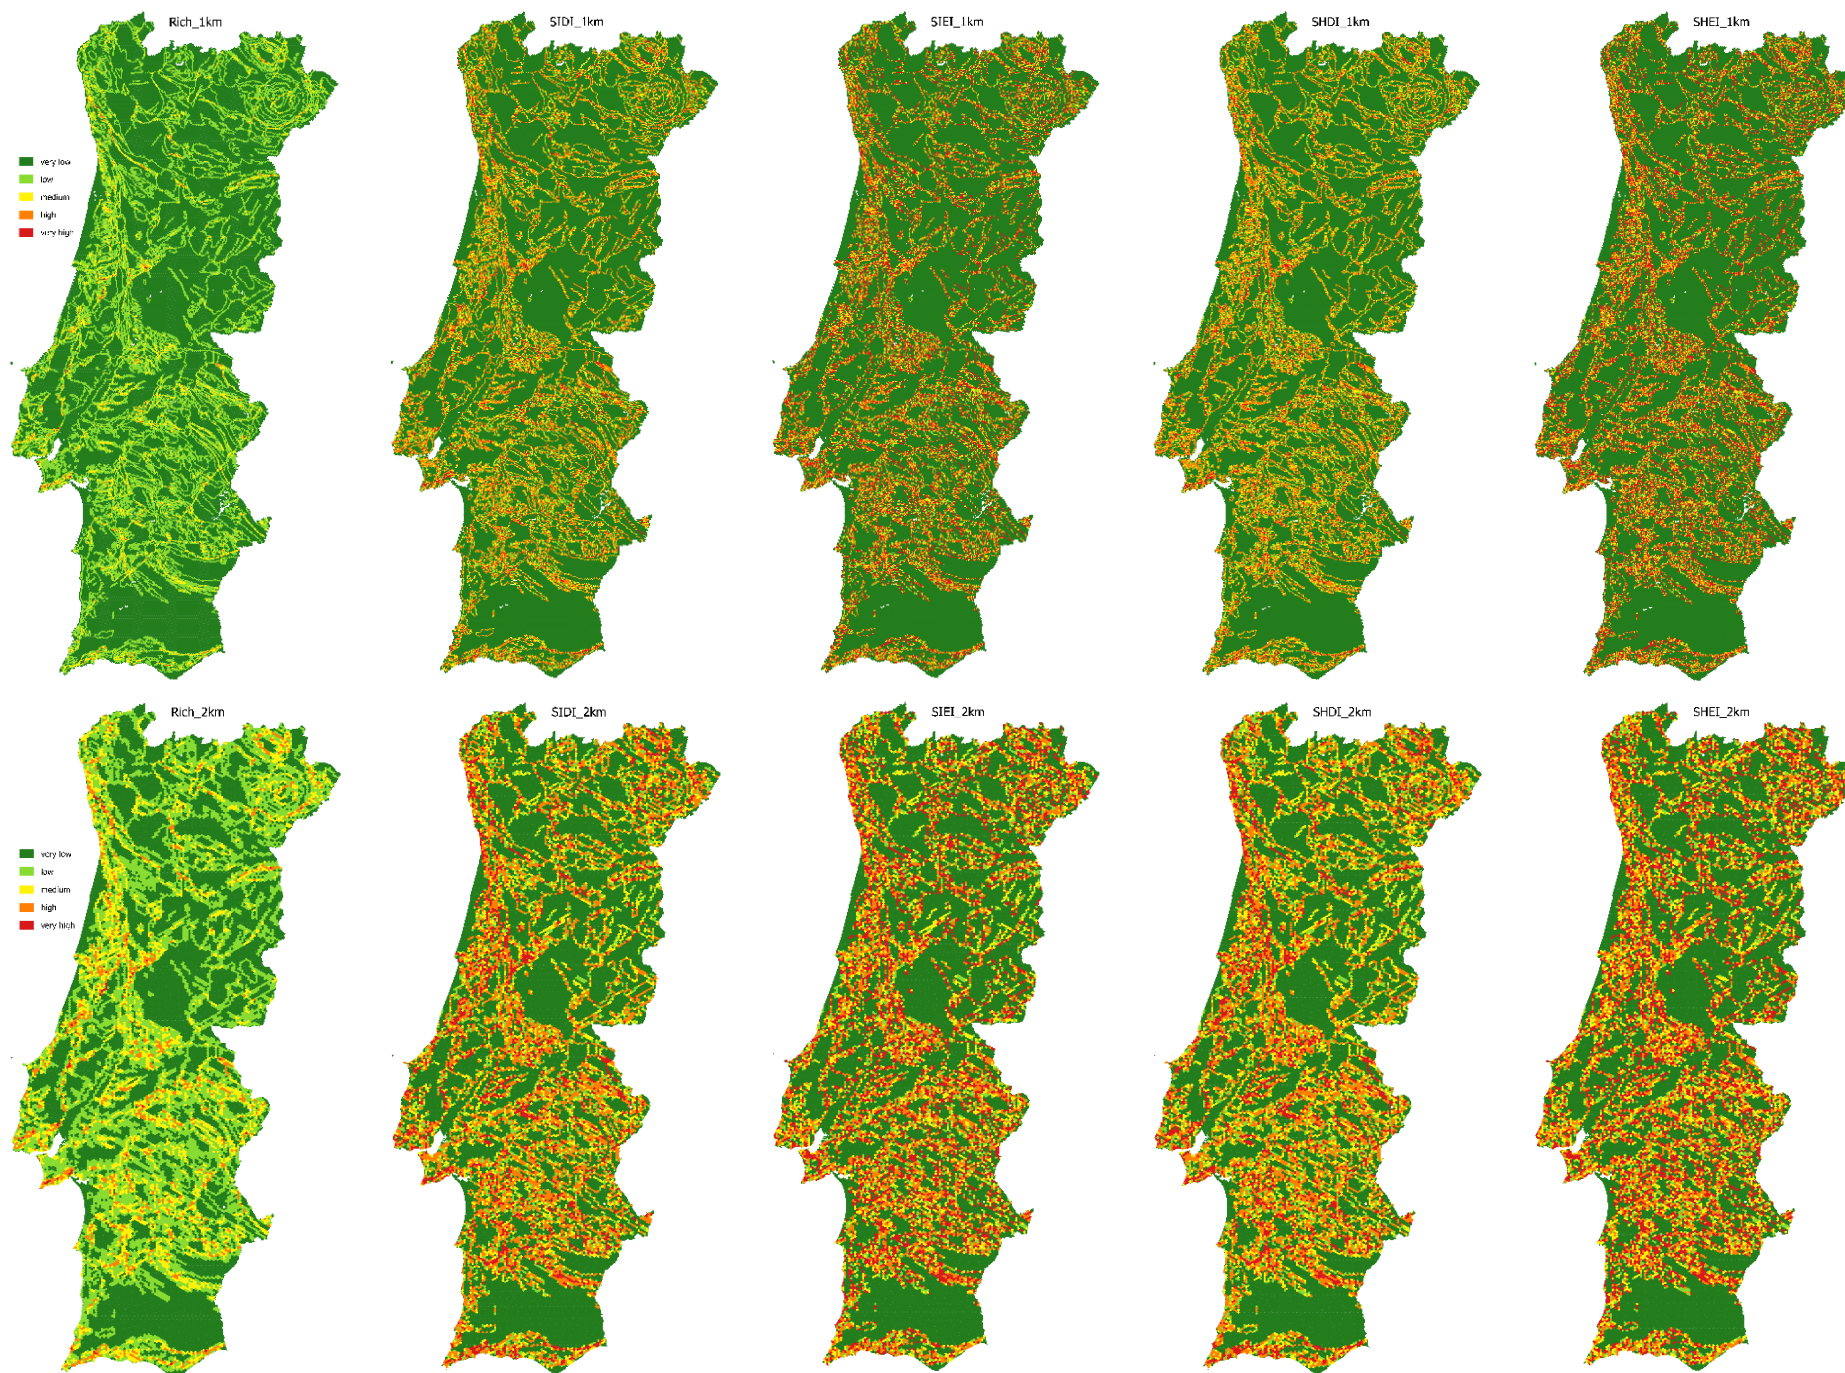



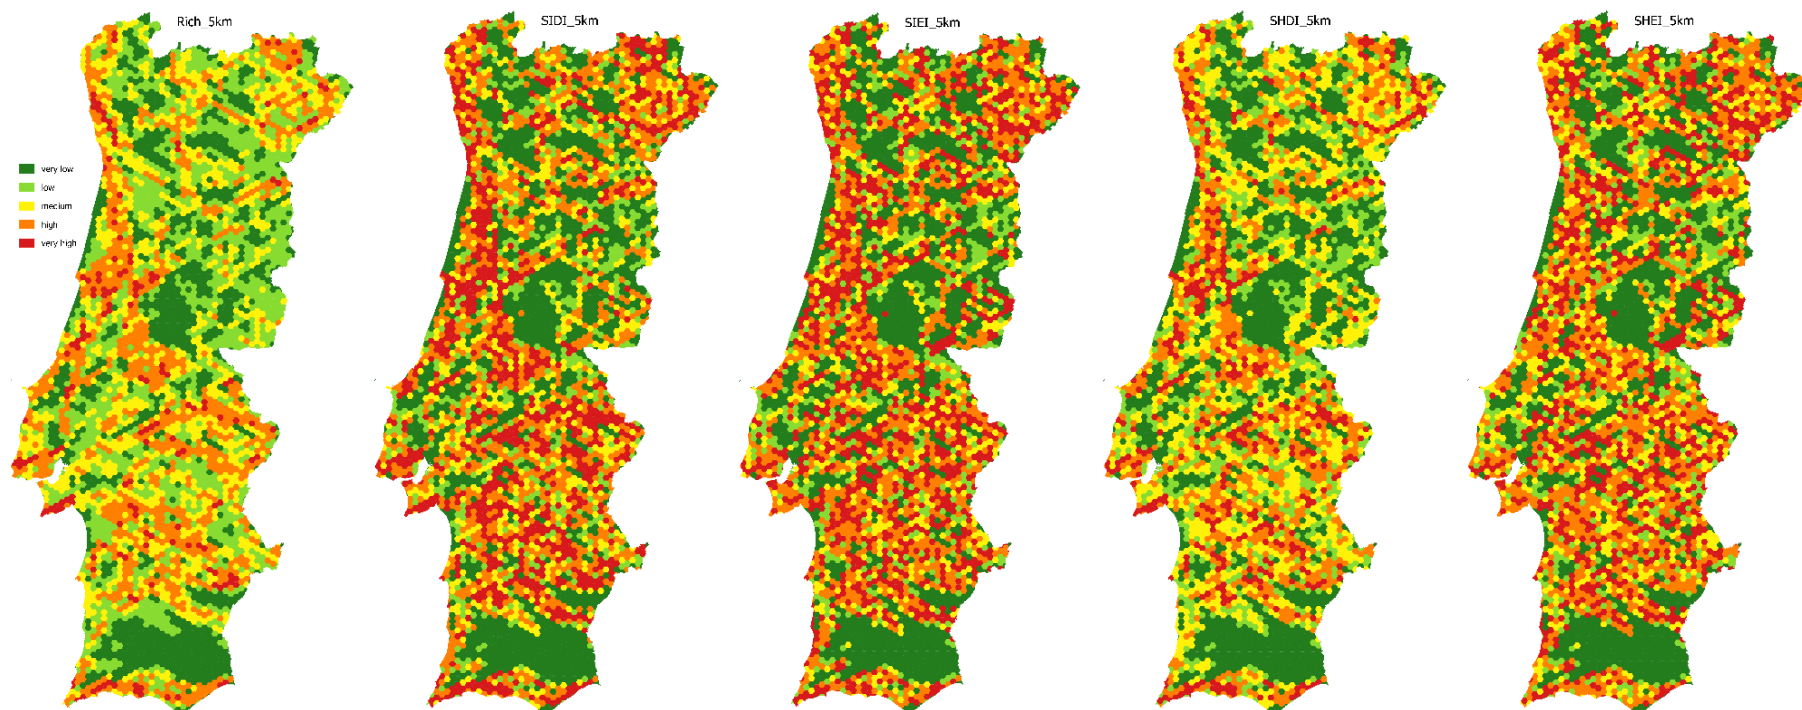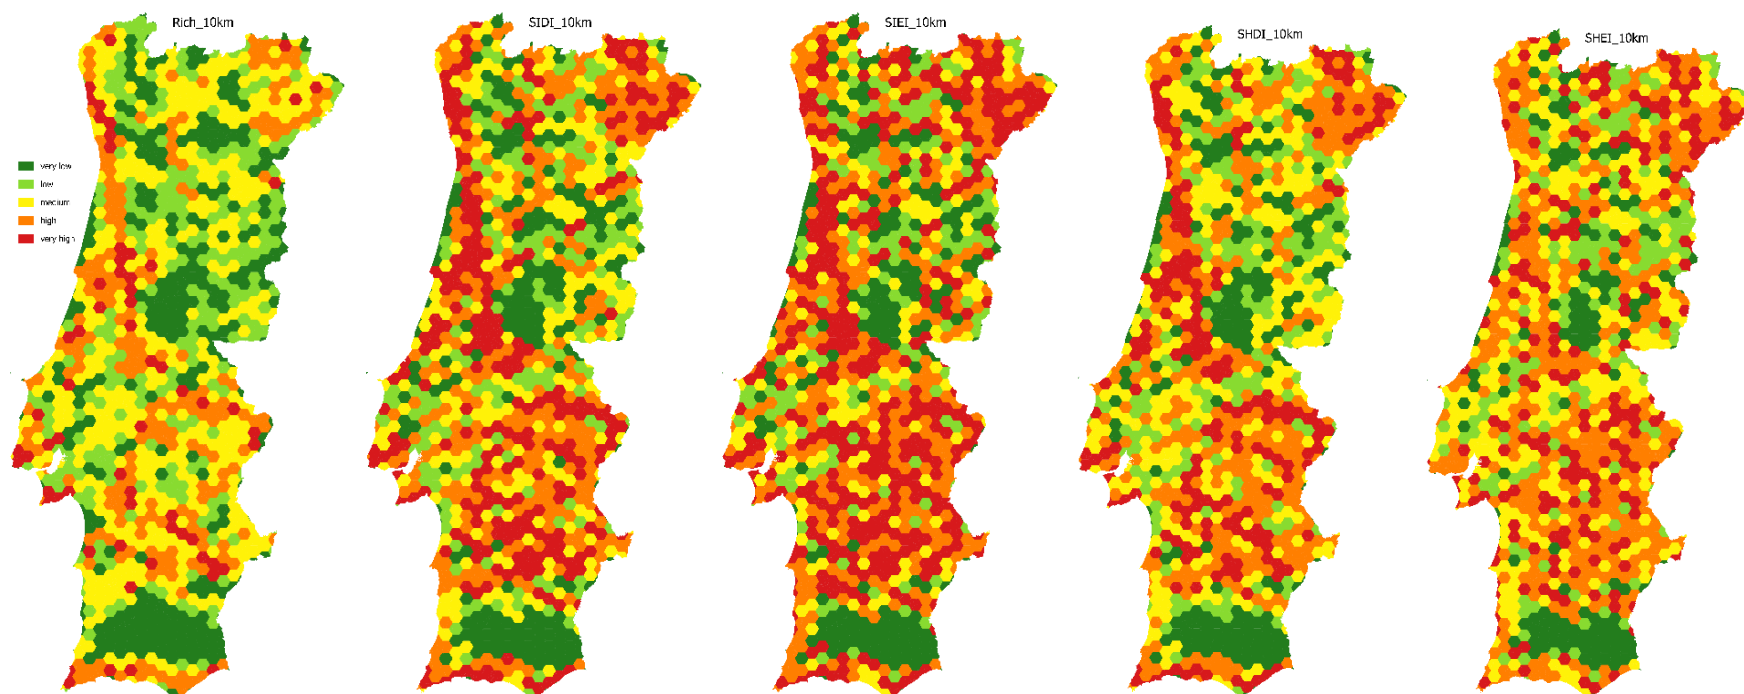

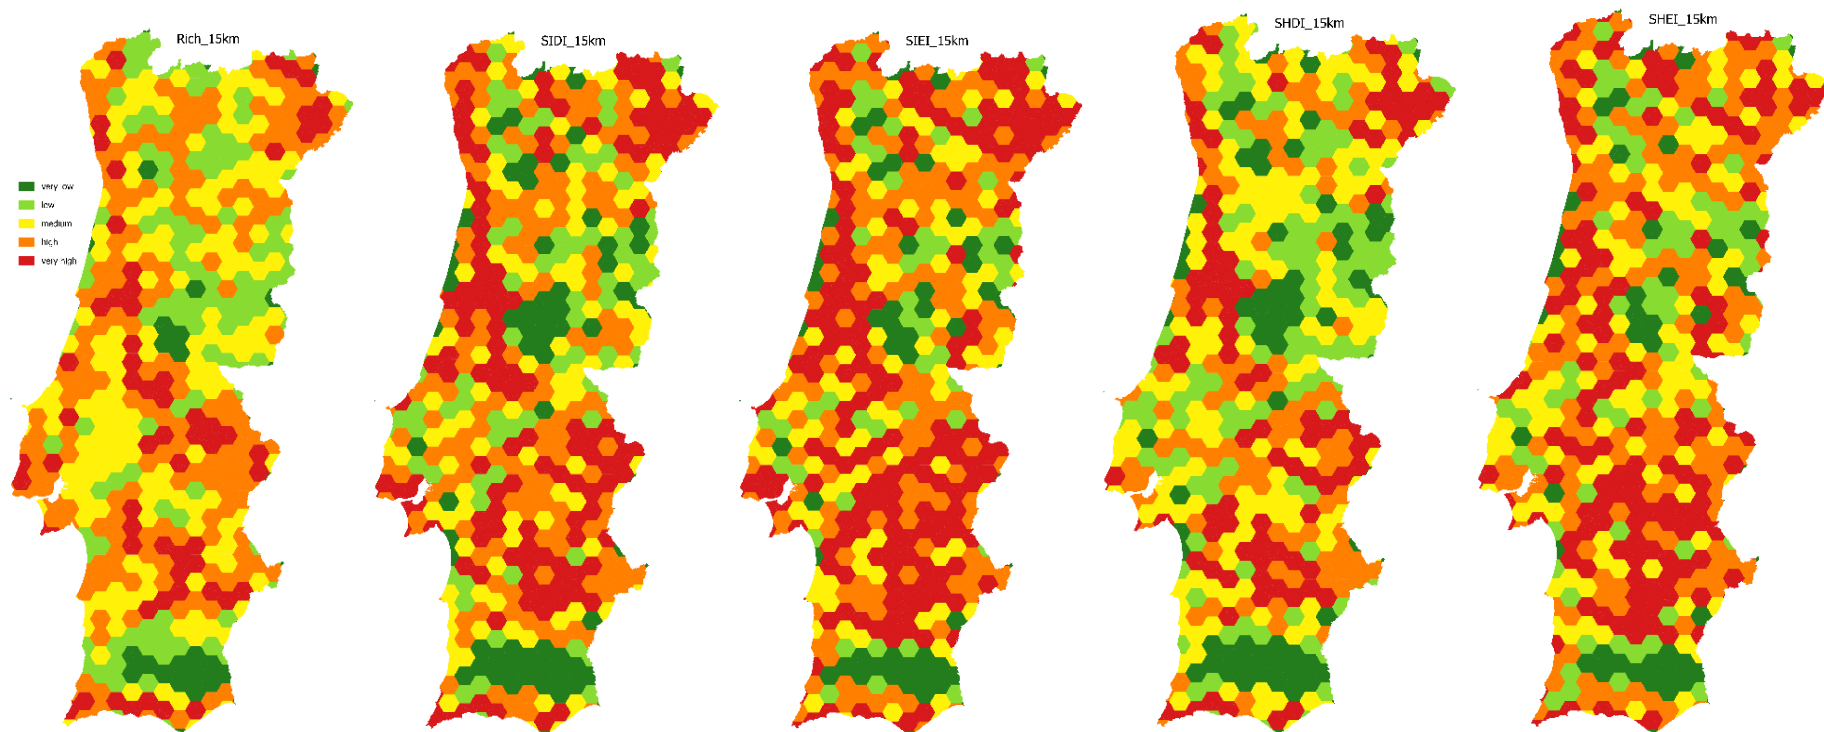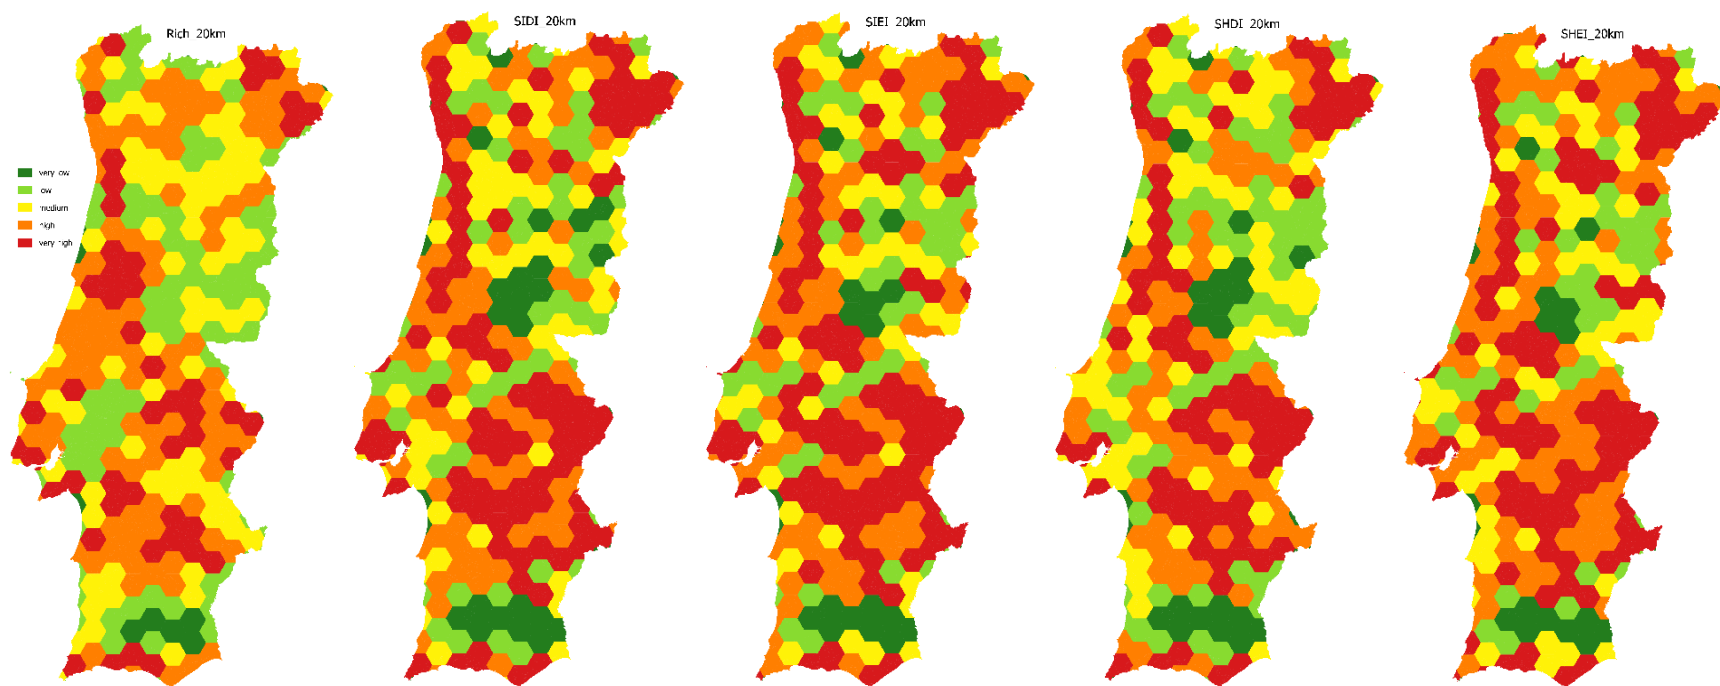

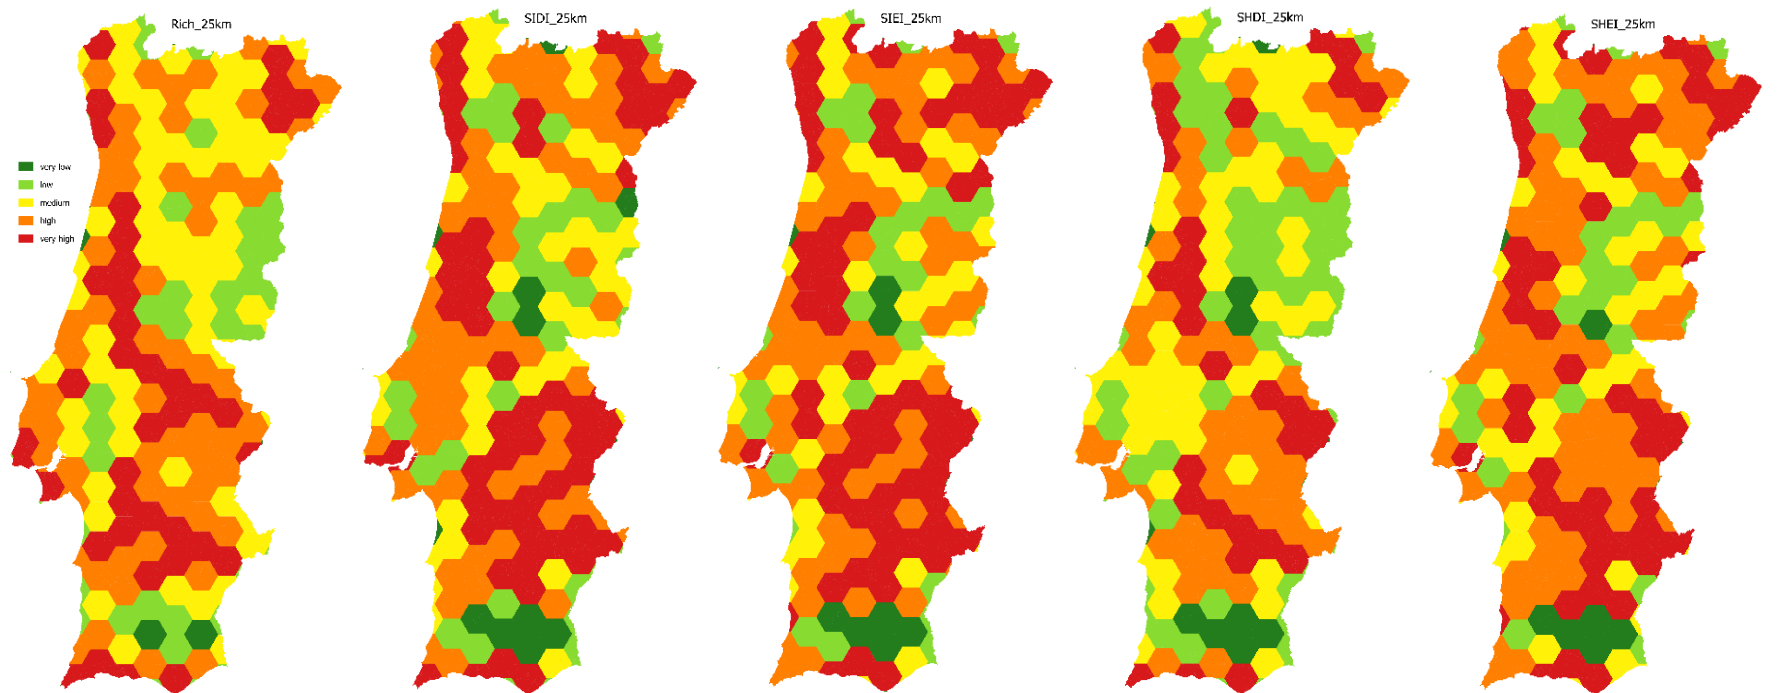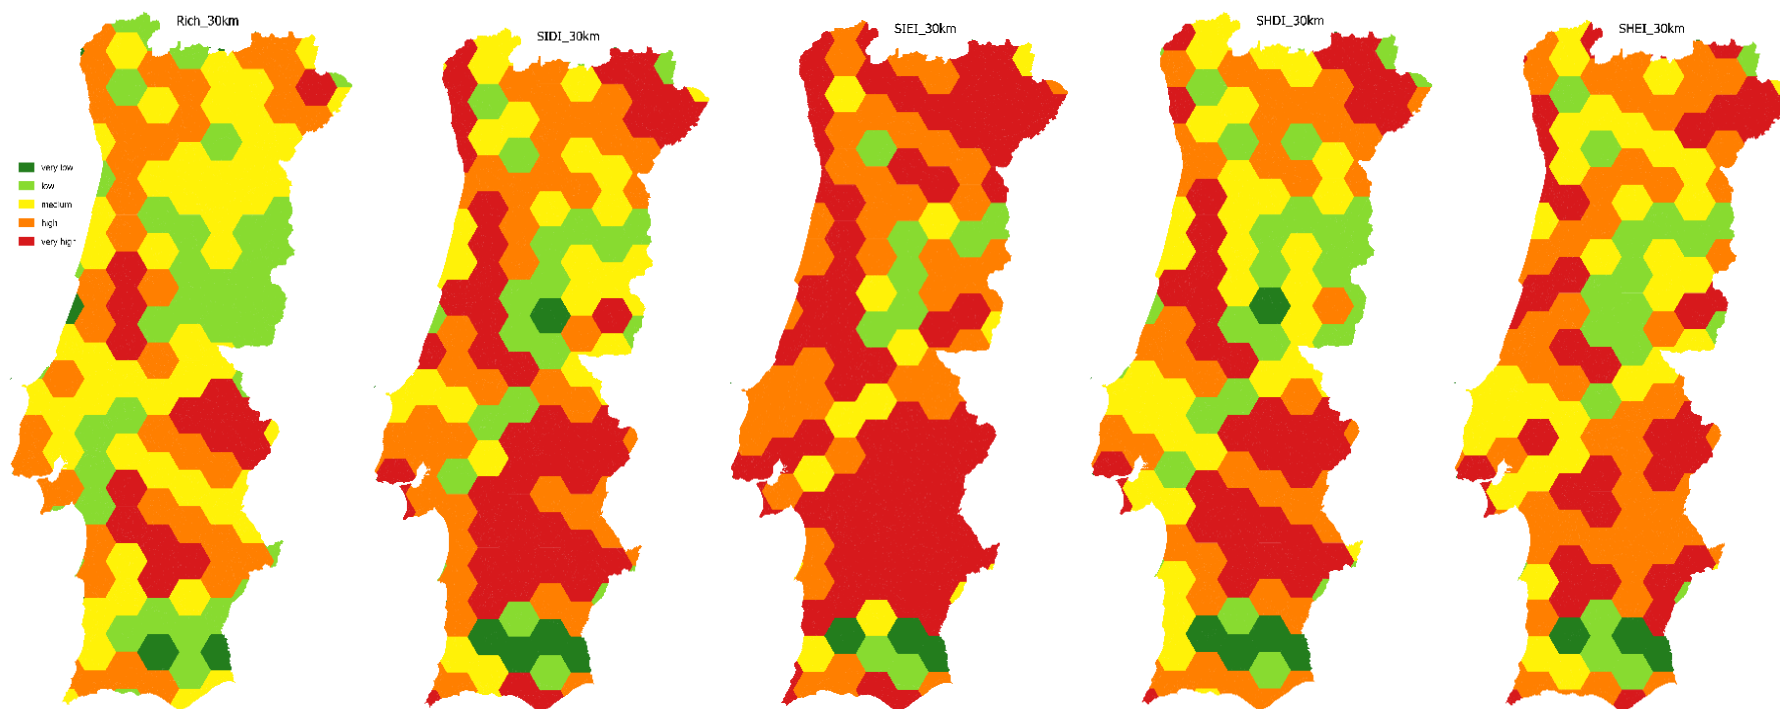





Figure S4: Maps expressing geomorphological diversity, richness and evenness of mainland Portugal through five indices (Richness, SIDI, SIEL, SHDI, SHEI) along eight cell sizes (1km, 2km, 5km, 10km, 15km, 20km, 25km, 30km). Each map represents five classes (very low, low, medium, high, very high) based on the Jenks natural breaks classification.

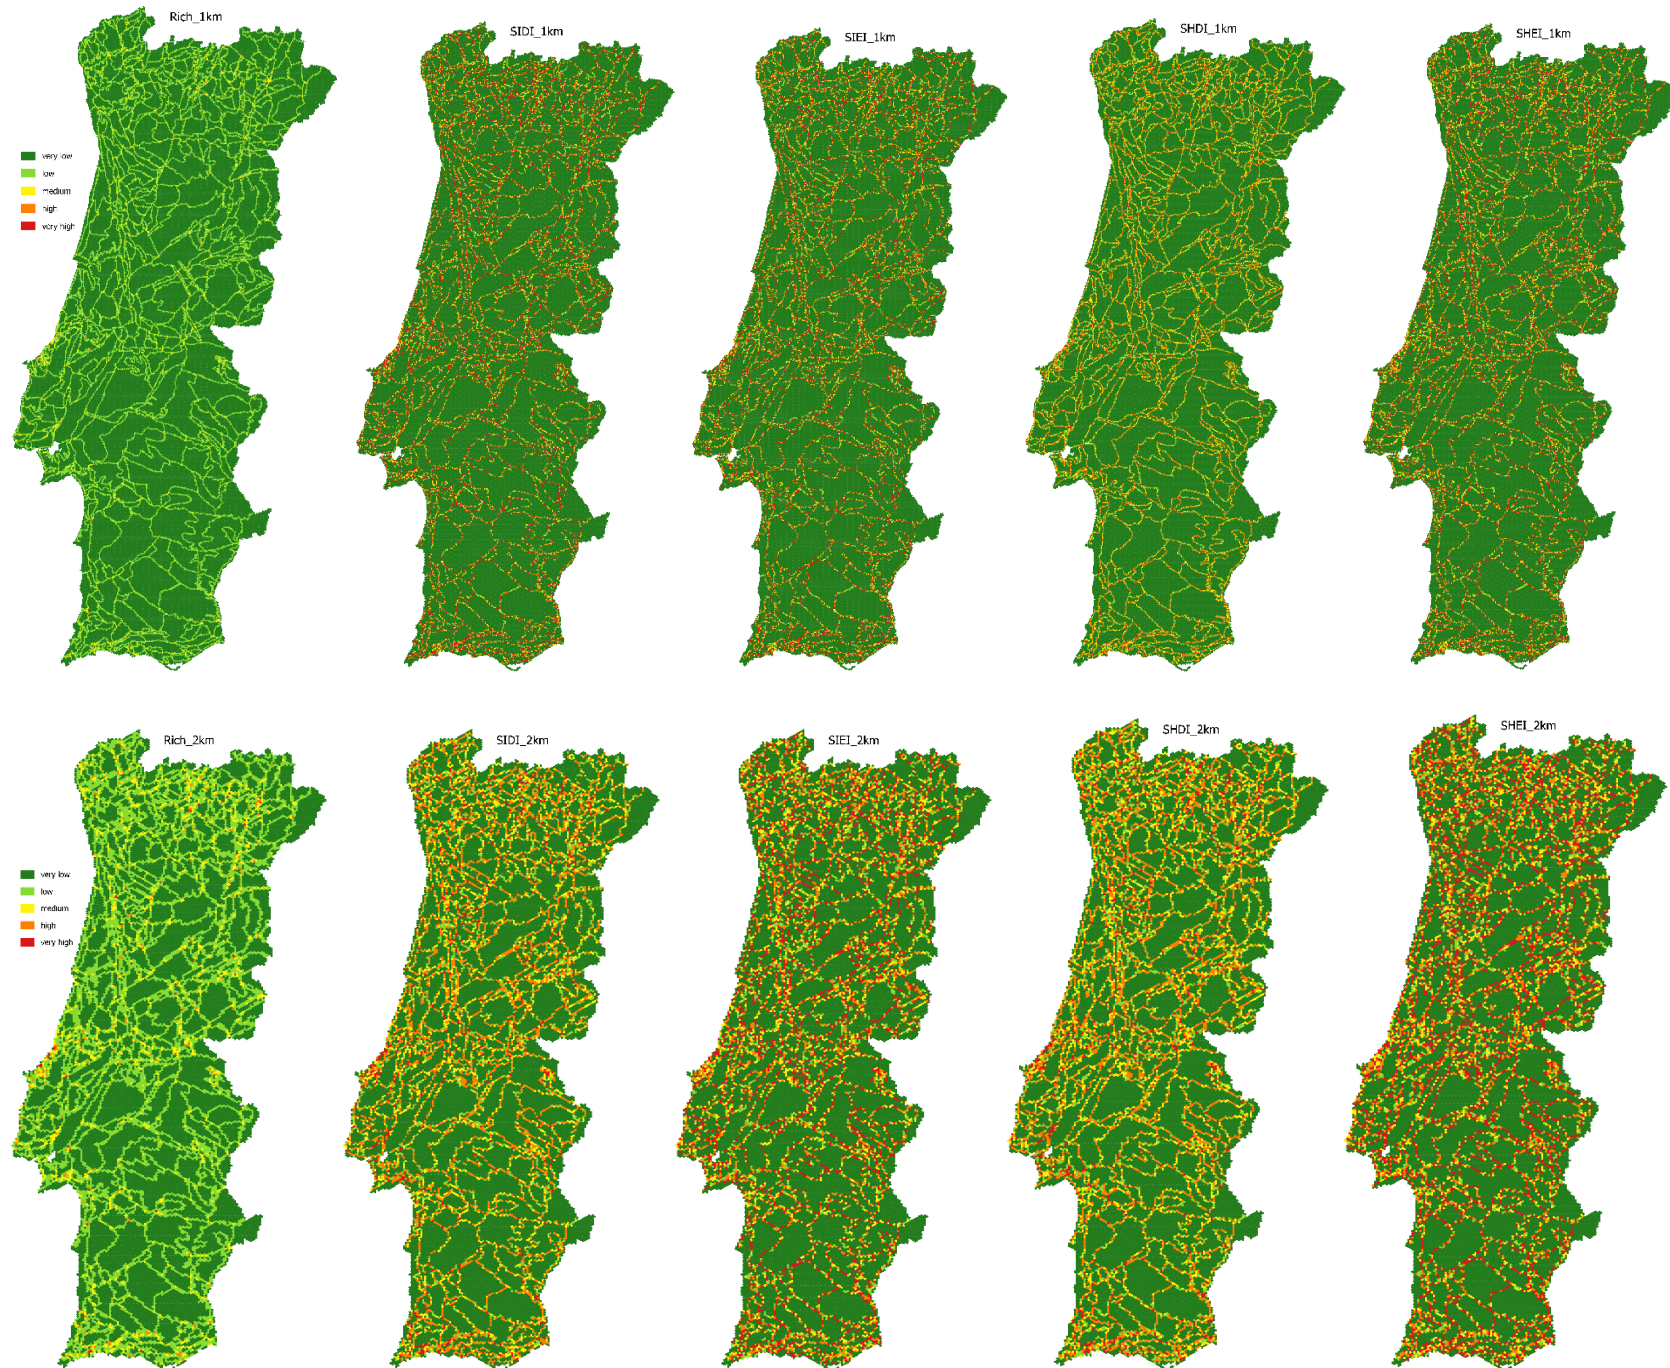

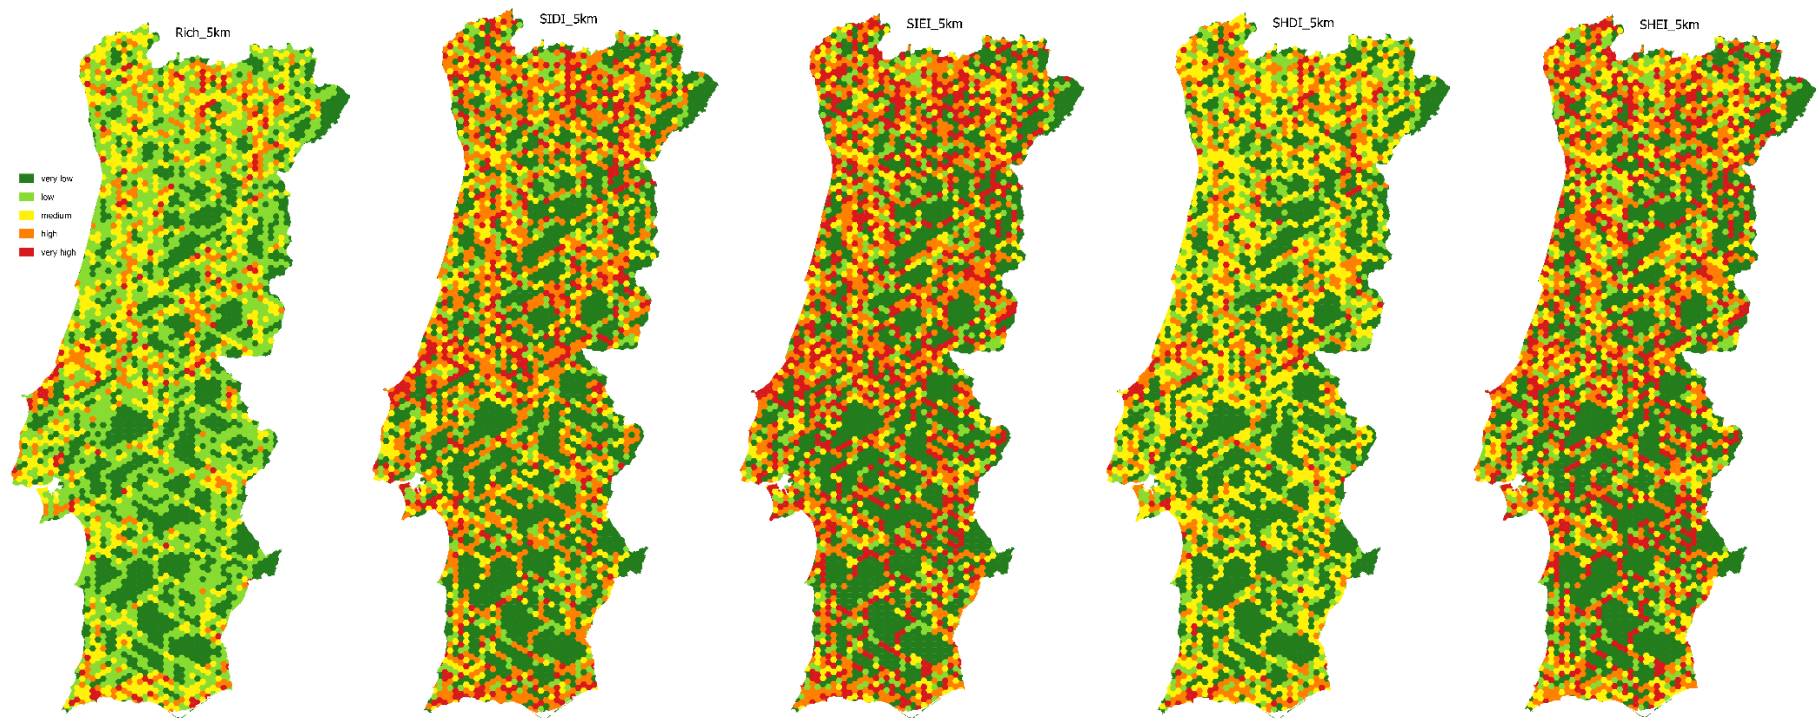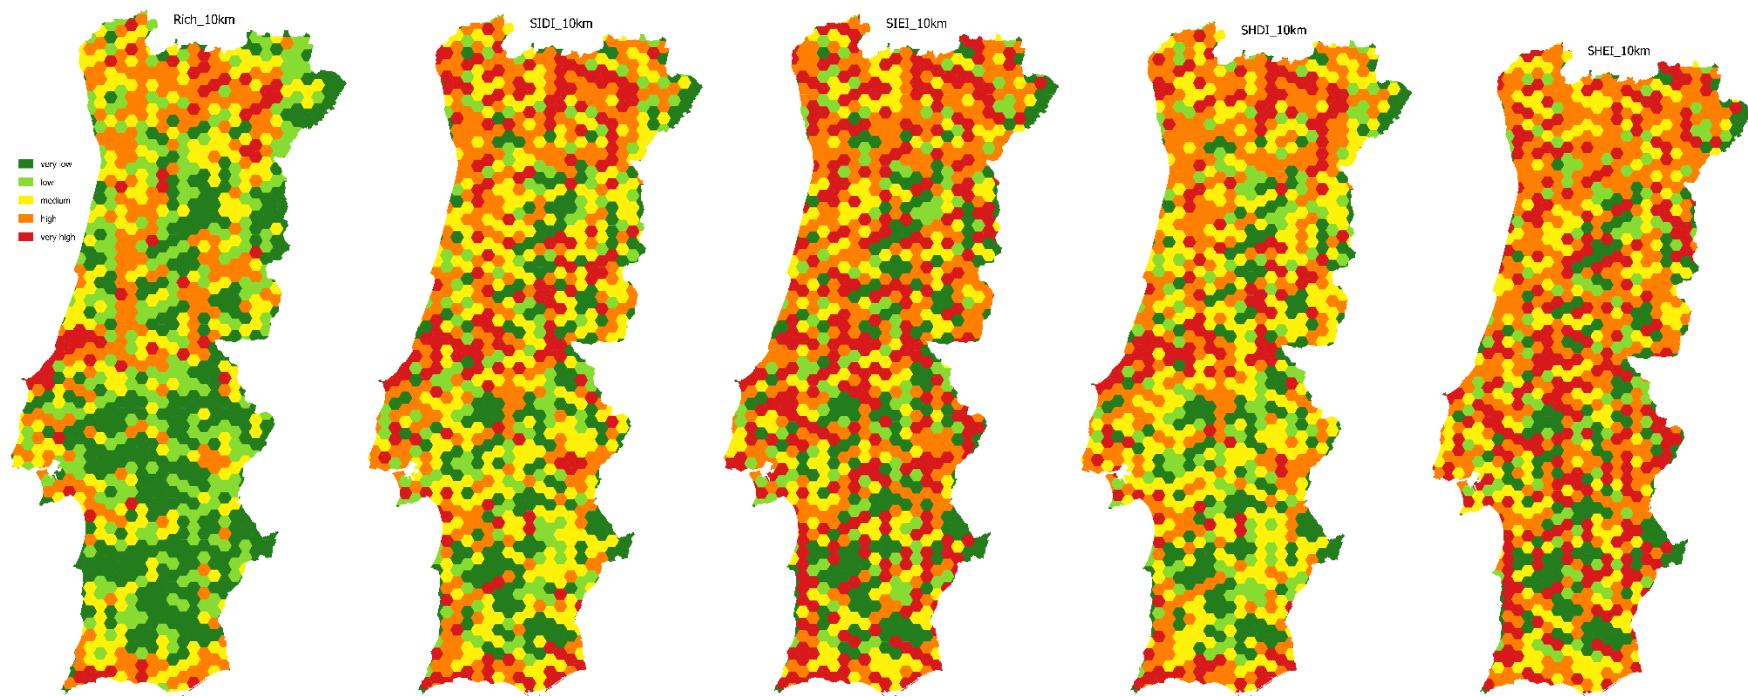



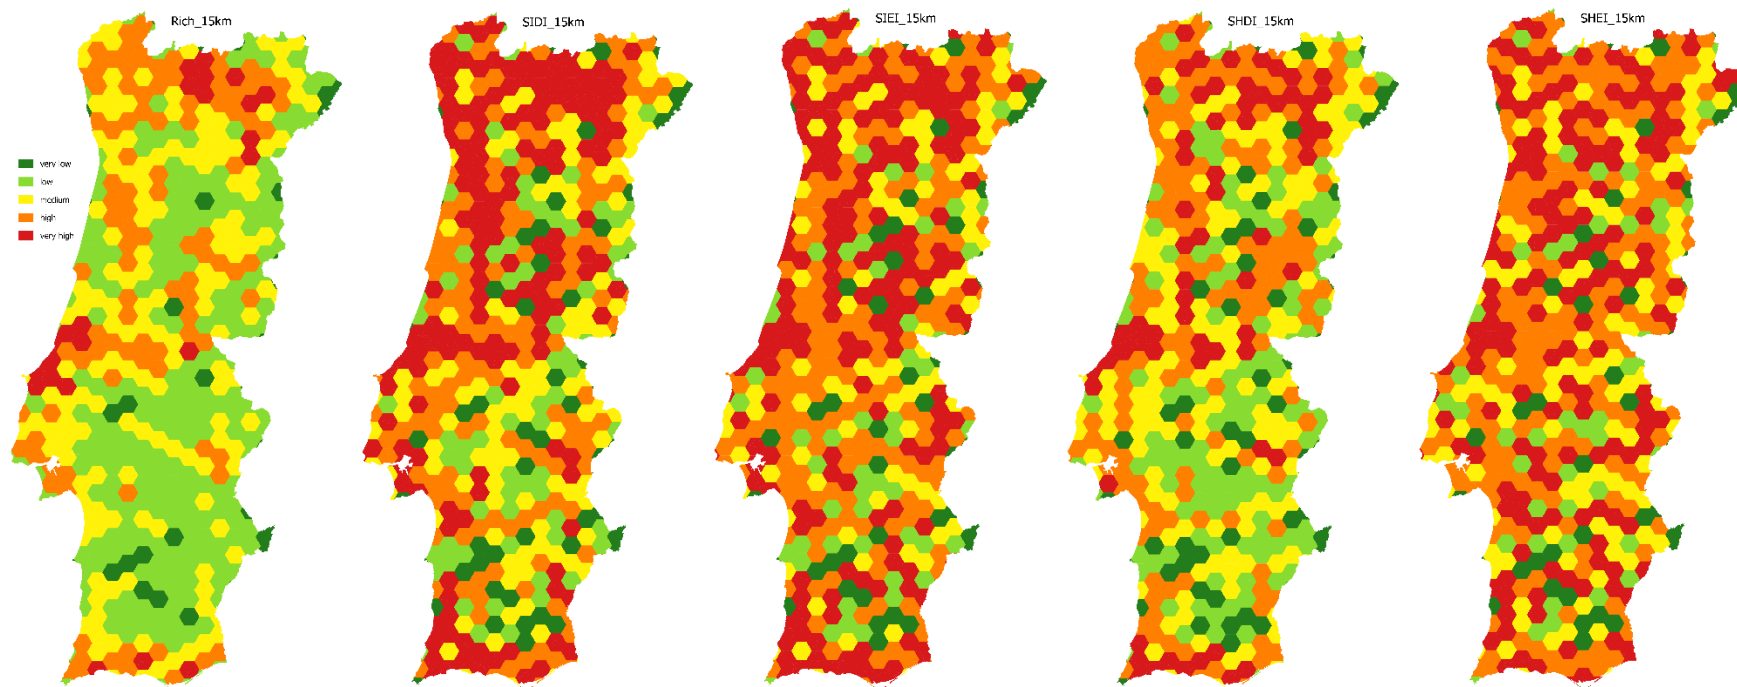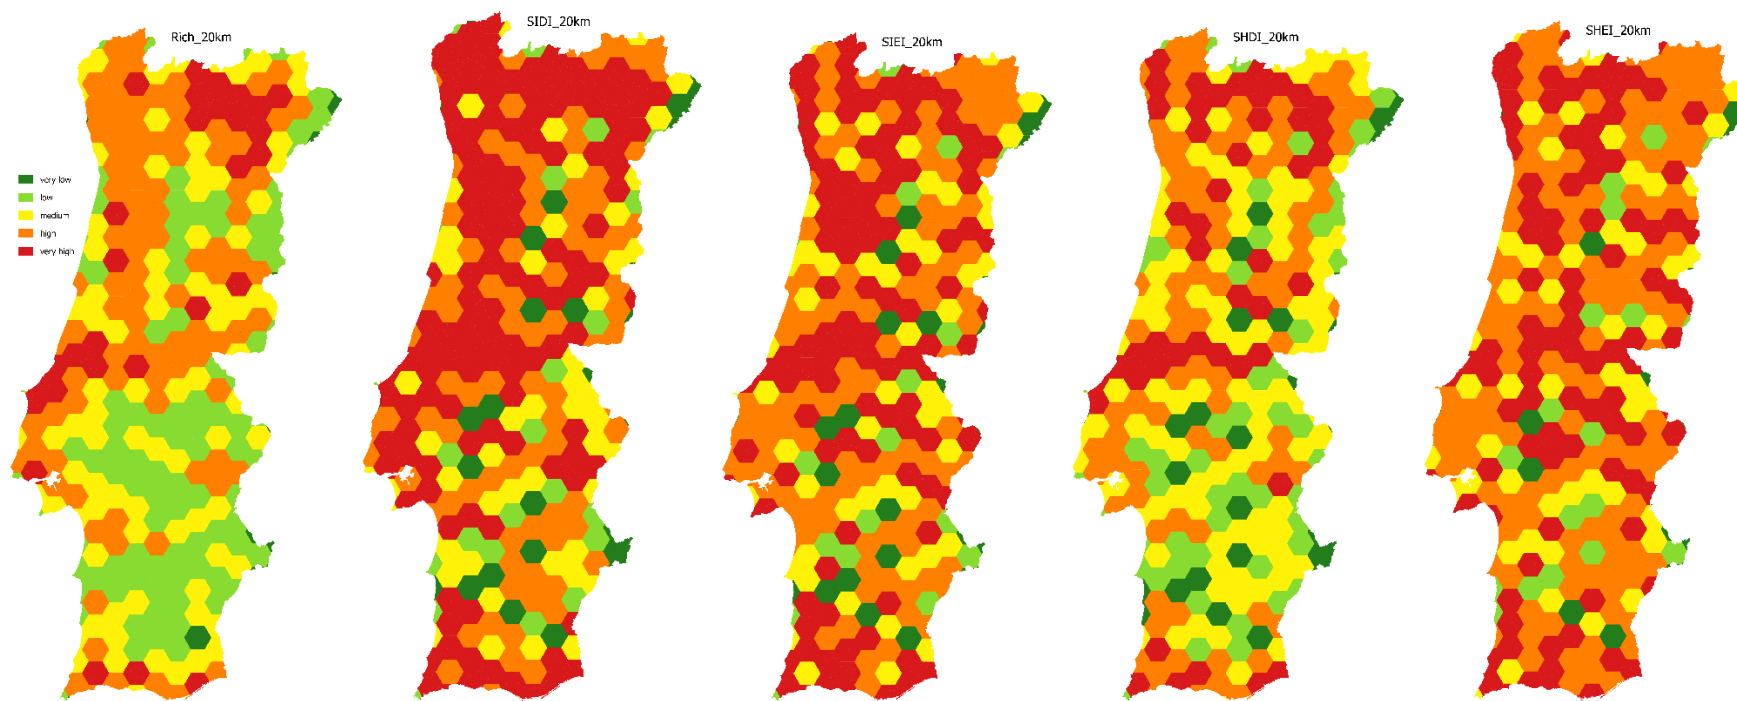

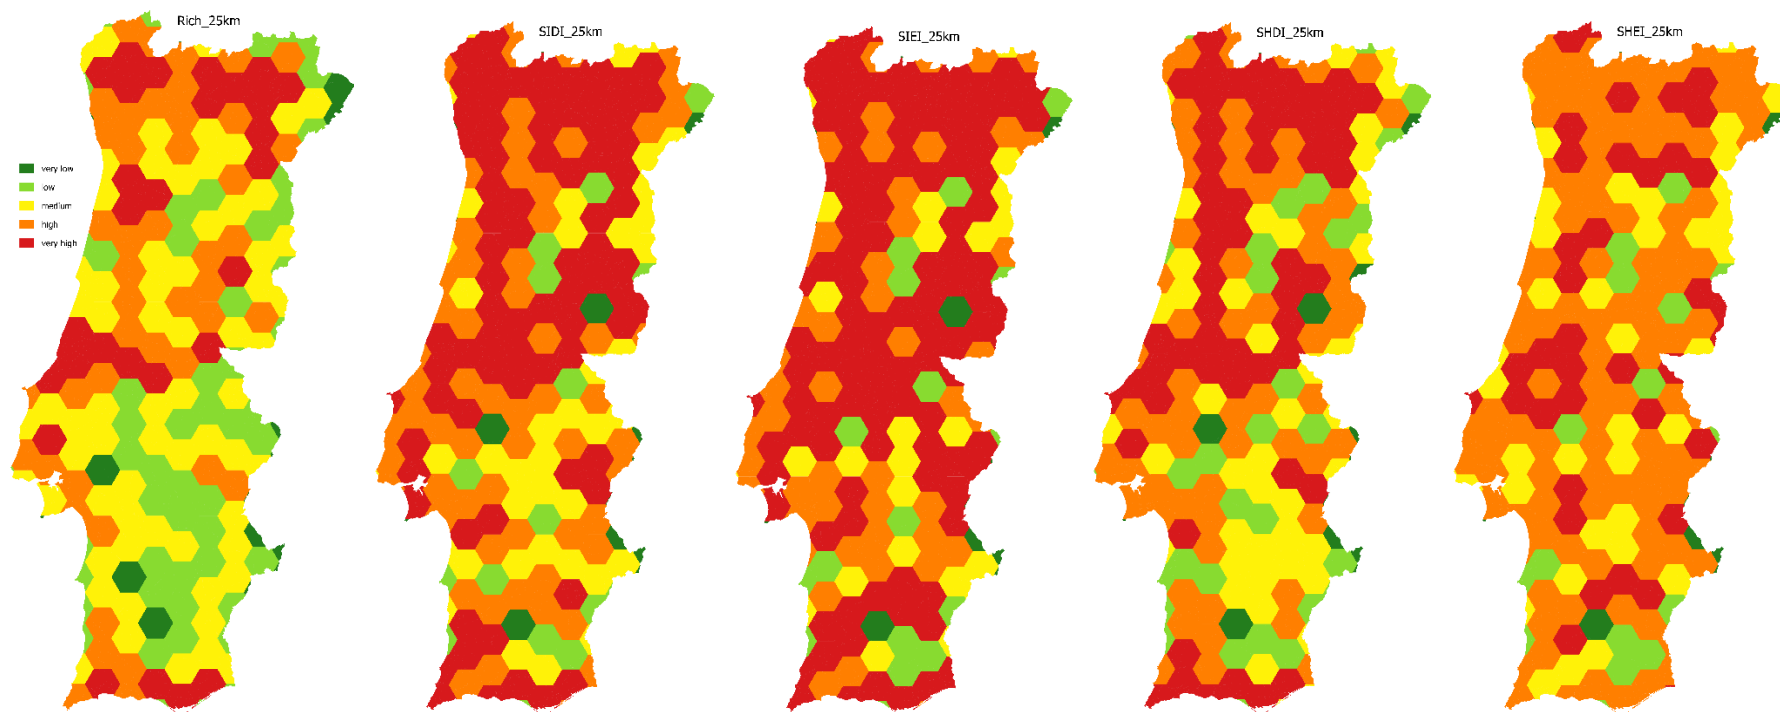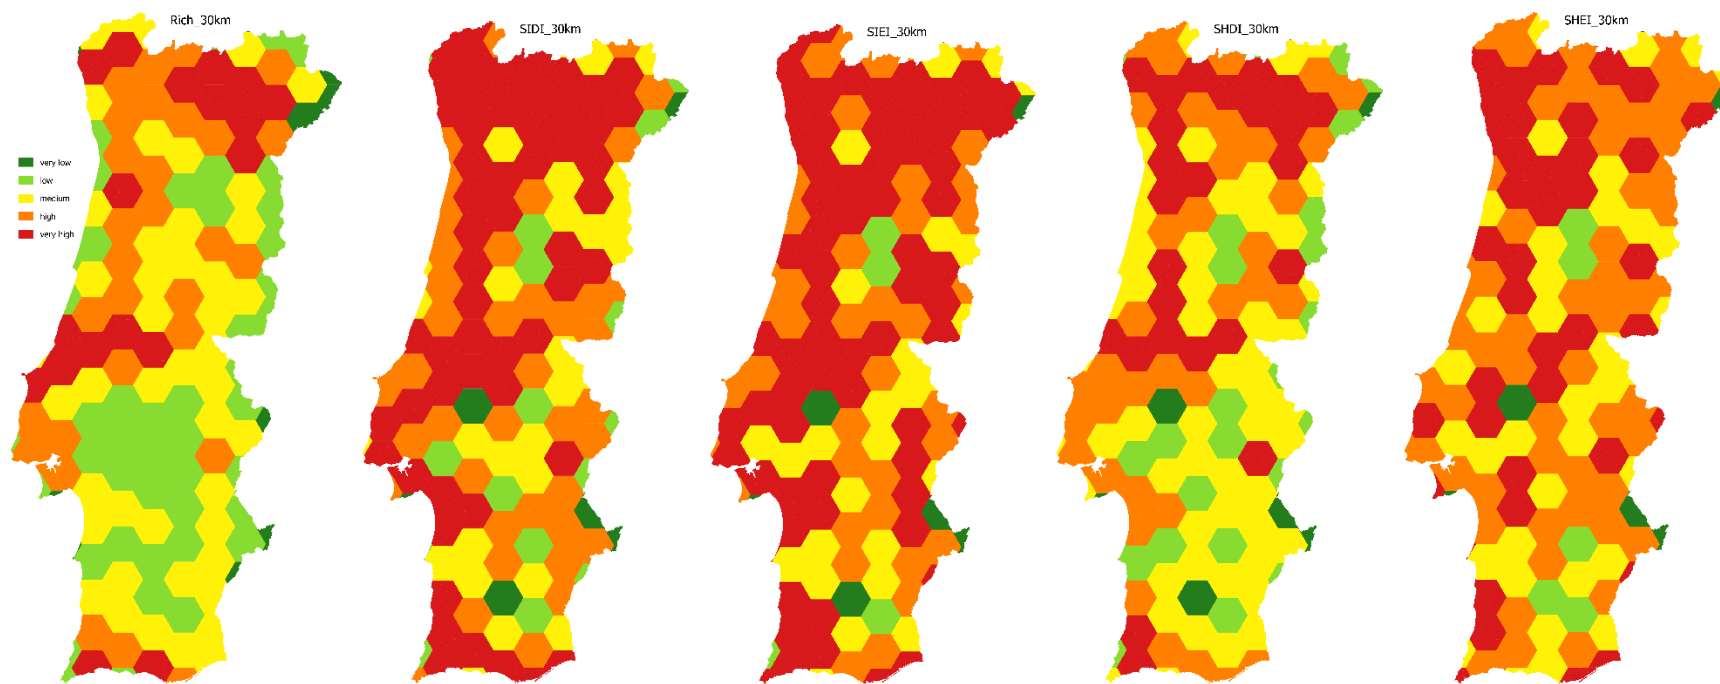

Supplement: s1 [file s1]
